# Supplementary material for: Partial Inhibition of RNA Polymerase I Promotes Animal Health and Longevity
Source: PubMed Central journal article supplement (PMC7013379; doi:10.1016/j.celrep.2020.01.017), 2020-02-11
Supplement: mmc1.pdf [file mmc1.pdf]

**Cell Reports, Volume 30**

**Supplemental Information**

**Partial Inhibition of RNA Polymerase I**

**Promotes Animal Health and Longevity**

**Guillermo Martínez Corrales, Danny Filer, Katharina C. Wenz, Abbie Rogan, George Phillips, Mengjia Li, Yodit Feseha, Susan J. Broughton, and Nazif Alic**

**A**

| yeast subunit | yeast gene    | fly gene       |
|---------------|---------------|----------------|
| A190          | <i>RPA190</i> | <i>Rpl1</i>    |
| A135          | <i>RPA135</i> | <i>Rpl135</i>  |
| A49           | <i>RPA49</i>  | -              |
| A43           | <i>RPA43</i>  | <i>CG13773</i> |
| A34.5         | <i>RPA34</i>  | -              |
| A14           | <i>RPA14</i>  | -              |
| A12.2         | <i>RPA12</i>  | <i>Rpl12</i>   |

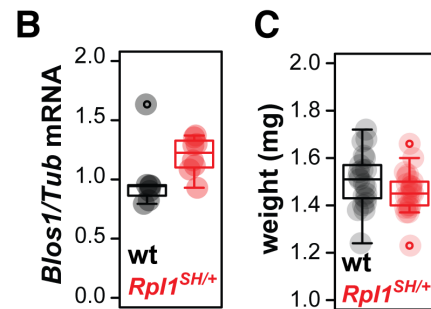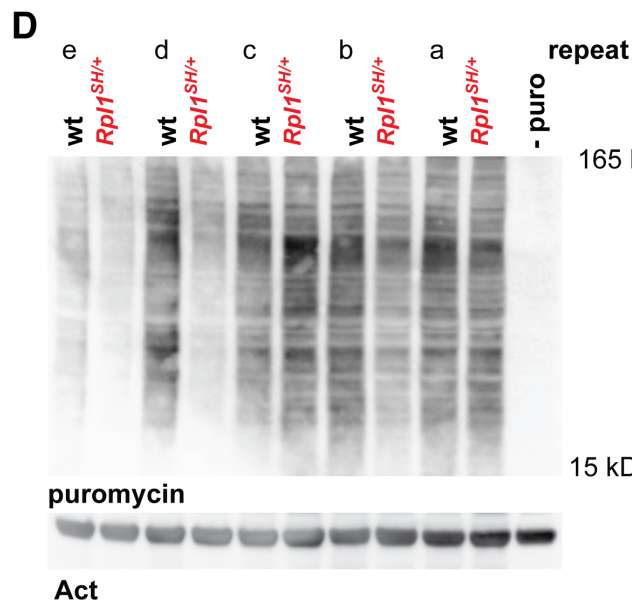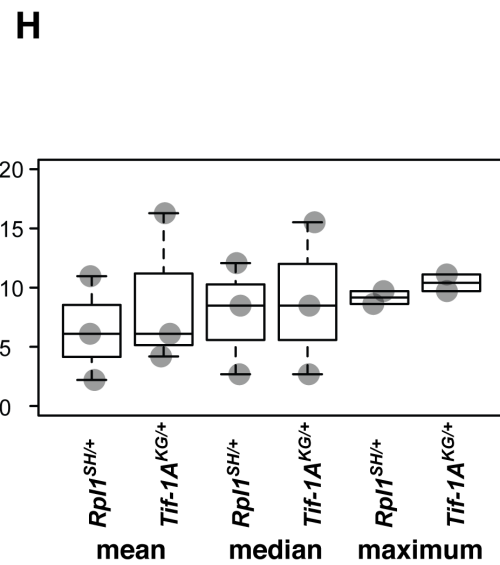

**E**

| covariate                                                    | effect | p                   |
|--------------------------------------------------------------|--------|---------------------|
| intercept                                                    | 0.151  | <1x10 <sup>-4</sup> |
| genotype ( <i>Rpl1<sup>SH/+</sup></i> )                      | -0.017 | 0.012               |
| nuclear size (large)                                         | 0.035  | <1x10 <sup>-4</sup> |
| genotype ( <i>Rpl1<sup>SH/+</sup></i> ):nuclear size (large) | -0.014 | 2x10 <sup>-4</sup>  |

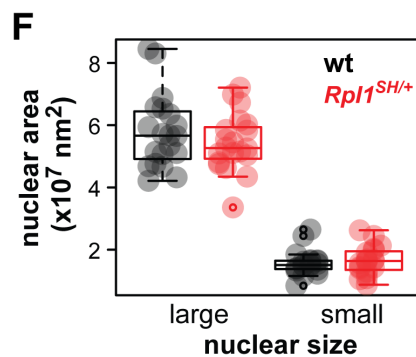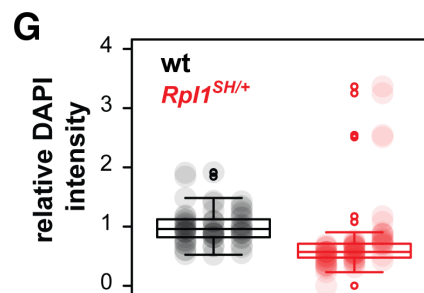

**Figure S1 Reduction in Pol I activity extends lifespan. Related to Figure 1.**

- (A) The fly genes encoding Pol I-specific subunits were identified with BLAST and reverse BLAST using the budding yeast genes. “-“ indicates that the subunit could not be identified.
- (B) Relative levels of *Blos1* mRNA in *Rpl1<sup>SH/+</sup>* and wild-type females (n=7-8 biologically independent samples, p>0.05, *t-test*).
- (C) Weight of *Rpl1<sup>SH/+</sup>* and wild-type females. *Rpl1<sup>SH/+</sup>* females tended to weight slightly less than the wild-type but this difference was not significant (n=21 individual flies, p>0.05, *t-test*).
- (D) Western blot showing all the repeats of the puromycin incorporation assay.
- (E) Results of the *mixed effect LM* analysis of relative nucleolar size.
- (F) Nuclear size in *Rpl1<sup>SH/+</sup>* and wild-type female guts (n= 1-5 nuclei per animal per nuclear size, 4-5 animals where values from the same animal are indicated as vertically aligned points in the box plot, effect of genotype p>0.05, nuclear size p<1x10<sup>-4</sup>, interaction p>0.05, *mixed effects LM* with “animal” as random effect).
- (G) DAPI intensities measured in ECs of *Rpl1<sup>SH/+</sup>* and wild-type females. *Rpl1<sup>SH/+</sup>* females tended to show lower DAPI signal in ECs than the wild-type but this difference was not significant (n= 20-25 nuclei, 3 animals where values from the same animal are indicated as vertically aligned points in the box plot, effect of genotype p>0.05, *mixed effects LM* with “animal” as random effect).
- (H) Summary of mean, median and maximum (last 5% surviving) lifespan extension in *Rpl1<sup>SH/+</sup>* females relative to wild-type females observed in three independent replicates. Lifespan was significantly extended in each (p<0.05, *log-rank test*). One of the replicates is shown in Figure 1. Note that due to the pattern of death, the maximum lifespan parameter could not be obtained from one replicate.

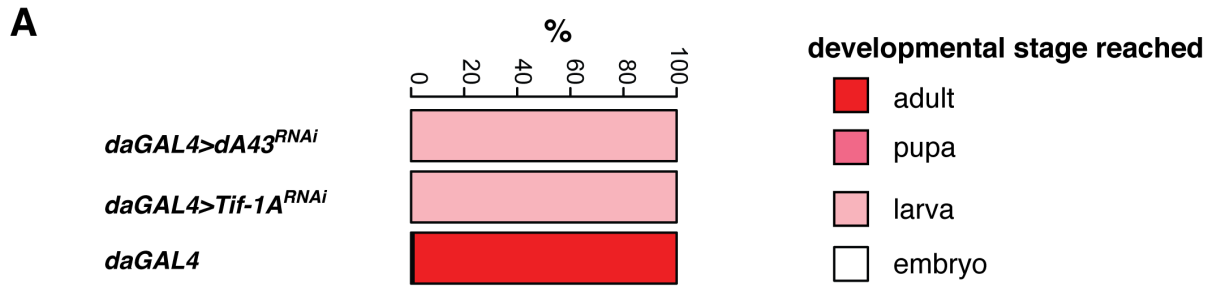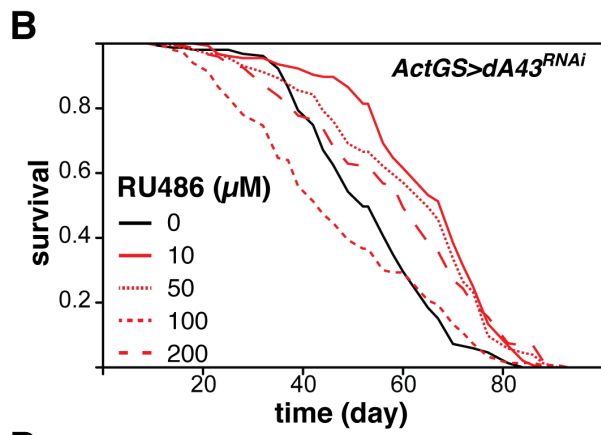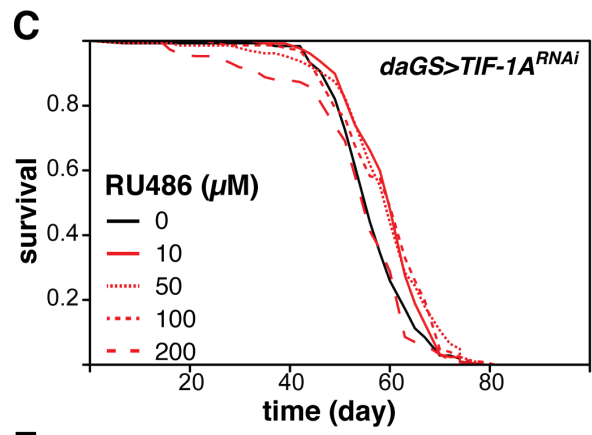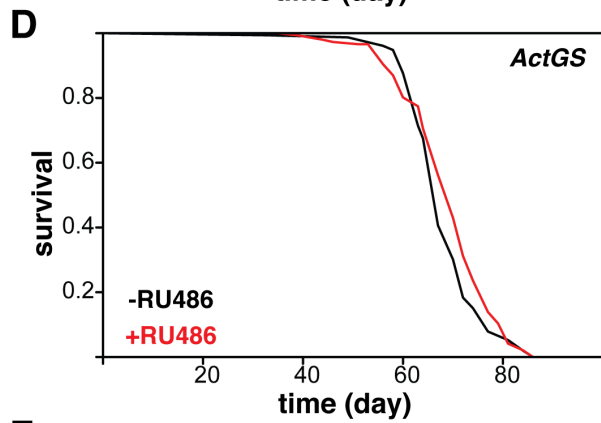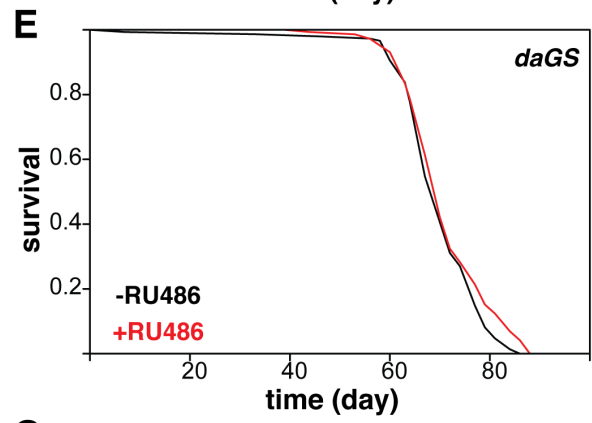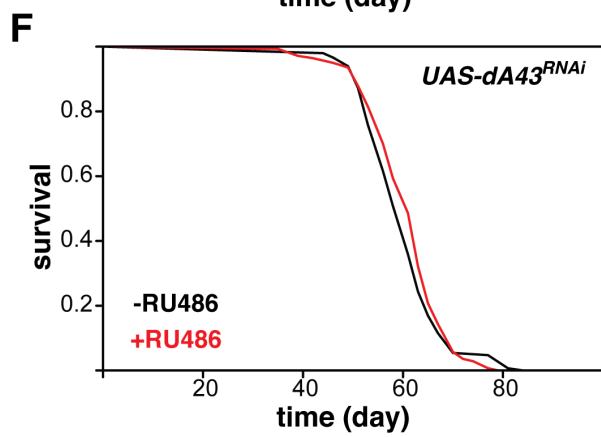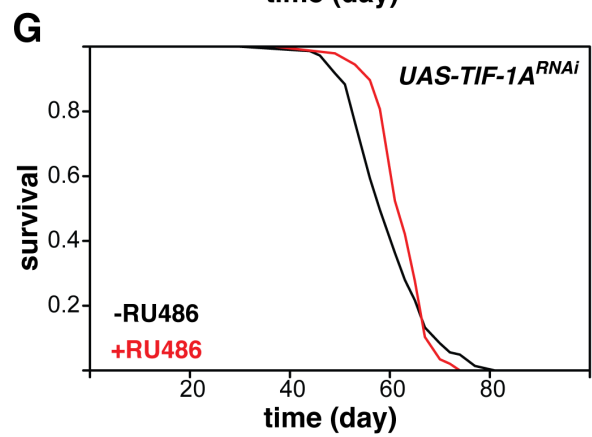

**Figure S2 Reduction in Pol I activity extends lifespan. Related to Figure 1.**

- (A) Pre-adult lethality resulting from ubiquitous, constitutive expression of *dA43<sup>RNAi</sup>* or *Tif-1A<sup>RNAi</sup>*. The frequency of the developmental stage reached is shown as %. Note that flies containing a balancer chromosome were removed from calculations. n= 54 – 107.
- (B) Lifespan of females with adult-onset, ubiquitous induction of *dA43<sup>RNAi</sup>* achieved by feeding a range of RU486 doses: 0  $\mu\text{M}$  (n= 154 dead/4 censored flies), 10  $\mu\text{M}$  (n= 155/1,  $p=4\times 10^{-12}$  to no RU486, *log-rank test*), 50  $\mu\text{M}$  (n= 157/5,  $p=4\times 10^{-8}$ ), 100  $\mu\text{M}$  (n= 150/1,  $p>0.05$ ), 200  $\mu\text{M}$  (n= 148/2,  $p=3\times 10^{-5}$ ).
- (C) Lifespan of females with adult-onset, ubiquitous induction of *Tif-1A<sup>RNAi</sup>* achieved by feeding a range of RU486 doses: 0  $\mu\text{M}$  (n= 115/16), 10  $\mu\text{M}$  (n= 127/14,  $p=5\times 10^{-3}$  to no RU486, *log-rank test*), 50  $\mu\text{M}$  (n= 124/16,  $p=2\times 10^{-3}$ ), 100  $\mu\text{M}$  (n= 128/15,  $p=3\times 10^{-3}$ ), 200  $\mu\text{M}$  (n= 131/19,  $p>0.05$ ).
- (D)- (H) Lifespans of control females carrying driver or transgene alone with/without RU486 (n $\approx$  150,  $p>0.05$ , *log-rank test*).

For lifespans, fly genotype is noted in the top right corner of each panel.

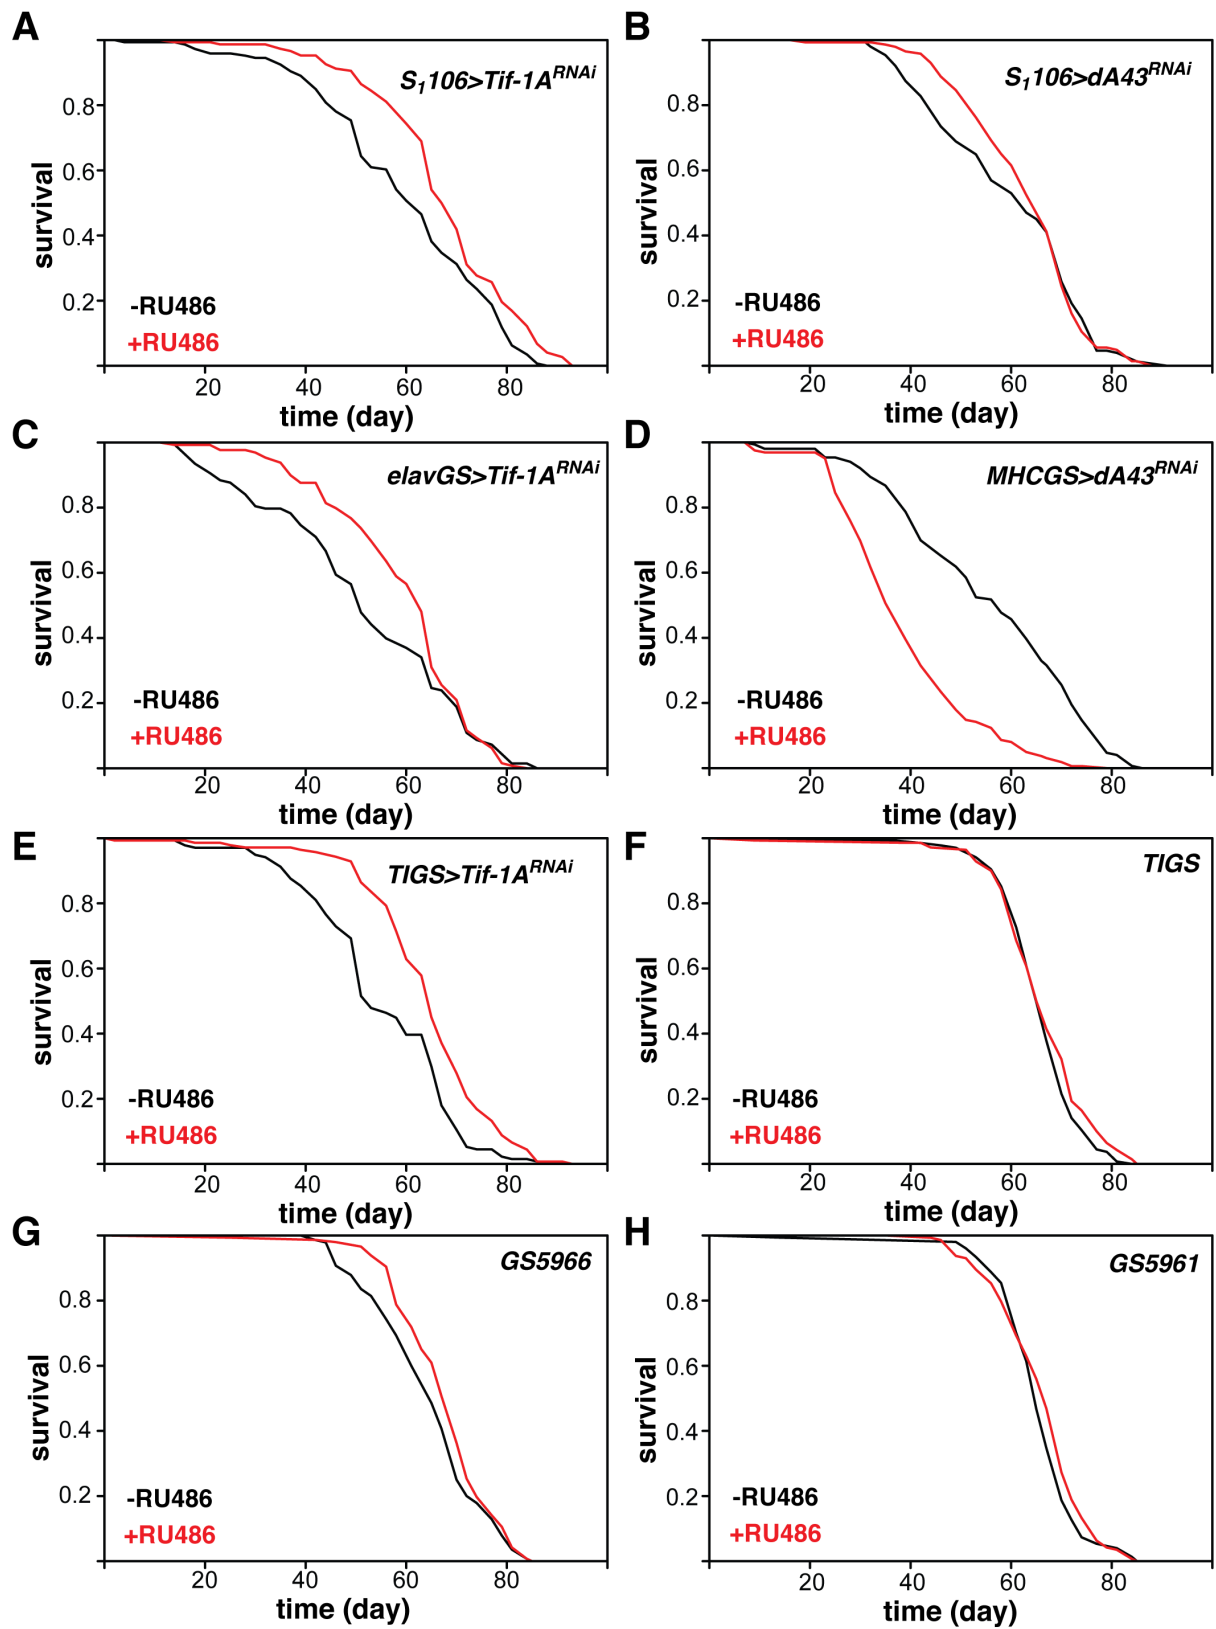

**Figure S3 Tissue-specific, adult-onset inhibition of Pol I can extend lifespan.**

**Related to Figure 2.**

- (A) Lifespan of females with adult-onset induction of *dA43<sup>RNAi</sup>* in fat body and gut achieved by RU486 feeding (-RU486 n= 151 dead/2 censored flies, +RU486 n= 143/1,  $p>0.05$ ).
- (B) Lifespan of females with adult-onset induction of *Tif-1A<sup>RNAi</sup>* in fat body and gut achieved by RU486 feeding (-RU486 n= 145/2, +RU486 n= 148/2,  $p=2\times 10^{-4}$ ).
- (C) Lifespan of females with adult-onset induction of *Tif-1A<sup>RNAi</sup>* in neurons achieved by RU486 feeding (-RU486 n= 138/1, +RU486 n= 129/3,  $p>0.05$ ).
- (D) Lifespan of females with adult-onset induction of *dA43<sup>RNAi</sup>* in muscle achieved by RU486 feeding (-RU486 n= 149/5, +RU486 n= 162/0,  $p=5\times 10^{-21}$ ).
- (E) Lifespan of females with adult-onset, gut-restricted induction of *Tif-1A<sup>RNAi</sup>* achieved by RU486 feeding (-RU486 n= 135 dead/3 censored, +RU486 n= 139/2,  $p=2\times 10^{-6}$ , *log-rank test*).
- (F) – (H) Lifespans of control females carrying driver alone with/without RU486 ( $n\approx 140$ ,  $p>0.05$ , *log-rank test*).

Fly genotype is noted in the top right corner of each panel.

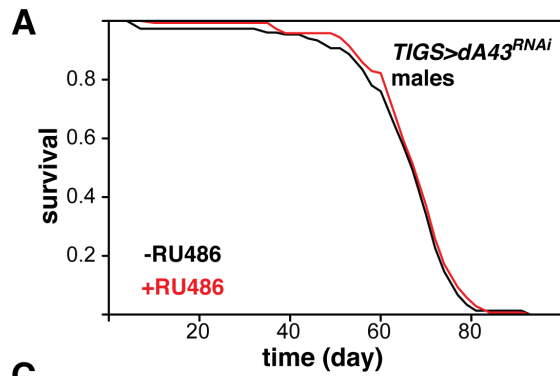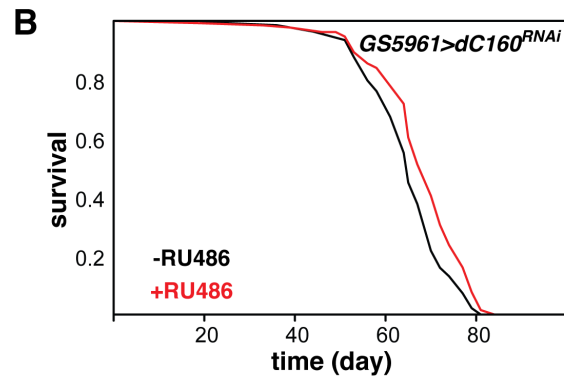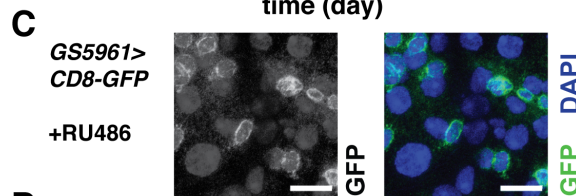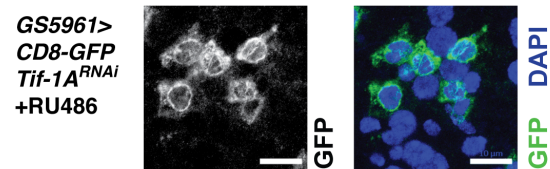

**D**  
covariate

| genotype                                                   |  | HR      | p                     |
|------------------------------------------------------------|--|---------|-----------------------|
| combined Pol I & III versus individual Pol I & III         |  | 1.30889 | 4.2x10 <sup>-11</sup> |
| Pol III versus Pol I                                       |  | 0.44783 | <2x10 <sup>-16</sup>  |
| <b>RU486</b>                                               |  | 0.70339 | 1.6x10 <sup>-6</sup>  |
| genotype:RU486                                             |  | HR      | p                     |
| combined Pol I and III versus individual Pol I & III:RU486 |  | 1.00982 | 0.85                  |
| Pol III versus Pol I:RU486                                 |  | 0.94065 | 0.48                  |

**E**

**Individual response variables**

*moving duration*      *velocity*      *time in central zone*      *rotation frequency*

**Multivariate analysis**

| Covariate    | p value           | <i>moving duration</i> | <i>velocity</i>   | <i>time in central zone</i> | <i>rotation frequency</i> |
|--------------|-------------------|------------------------|-------------------|-----------------------------|---------------------------|
| age          | <10 <sup>-4</sup> | <10 <sup>-4</sup>      | <10 <sup>-4</sup> | 1.6x10 <sup>-3</sup>        | <10 <sup>-4</sup>         |
| genotype     | 0.06              | 0.06                   | 0.77              | 0.14                        | 0.64                      |
| age:genotype | 0.01              | 0.01                   | 0.26              | 0.93                        | 0.24                      |

**F**

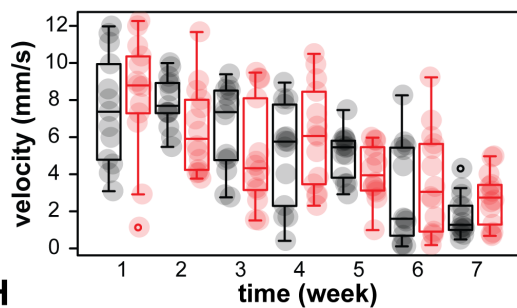

**G**

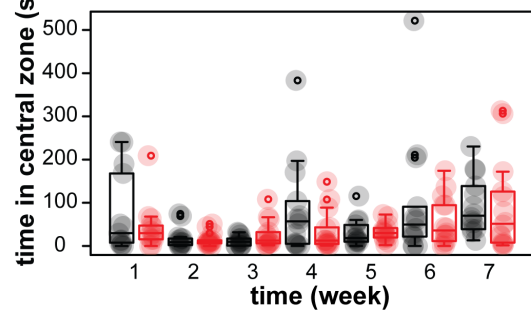

**H**

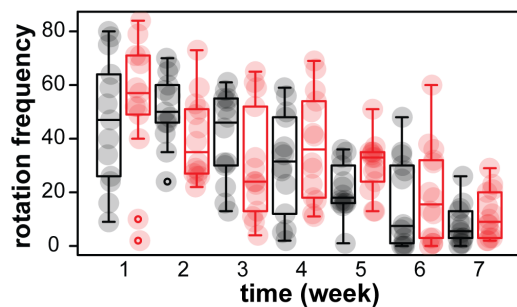



**Figure S4 Relationship between Pol I and Pol III in the ISCs and analysis of exploratory walking. Related to Figure 3 and Figure 4.**

- (A) Induction of  $dA43^{RNAi}$  in the male gut does not extend lifespan ( $n \approx 150$ ,  $p > 0.05$ , *log-rank test*).
- (B) Lifespan of females with adult-onset induction of  $dC160^{RNAi}$  (targeting Pol III) in the ISCs achieved by RU486 feeding (-RU486  $n = 138$  dead/3 censored flies, +RU486  $n = 131/1$ ,  $p = 1 \times 10^{-3}$ , *log-rank test*). Note that this lifespan was carried out in parallel with the lifespans presented in Figure 4B. Fly genotype is noted in top right corner in A and B.
- (C)  $UAS-Tif-1A^{RNAi}$  does not interfere with the ability of the  $GS5961$  driver to induce expression of  $UAS-CD8-GFP$  in the presence of RU486 (scale bar = 10  $\mu m$ ).
- (D) *Cox Proportional Hazards* analysis of the interaction between induction of  $dC160^{RNAi}$  or  $Tif-1A^{RNAi}$  in ISCs (total  $n = 770$  dead/ 57 censored flies). The model examined the effect of genotype, RU486 and their interaction where the effect of genotype was assessed using two *a priori* contrasts: 1) comparing the genotype containing both RNAi lines to the genotypes containing only one RNAi line, 2) comparing the genotypes containing the single RNAi lines to each other. “:” indicates the interaction term. Note that the lack of significant interaction between genotype and RU486 indicates the lifespan effects of each Pol I are not significantly different from each other or from the combined knockdown. The data included in the model are shown in Figure 3B and Figure S3B.
- (E) Full statistical analysis of exploratory walking data. Results of the multivariate LM including the response of individual variables.
- (F) – (H) Additional parameters of exploratory walking.
