# Supplementary material for: Partial Inhibition of RNA Polymerase I Promotes Animal Health and Longevity
Source: PubMed Central journal article supplement (PMC7013379; doi:10.1016/j.celrep.2020.01.017), 2020-02-11
Supplement: mmc2.pdf [file mmc2.pdf]

## Partial Inhibition of RNA Polymerase I Promotes Animal Health and Longevity

### Graphical Abstract

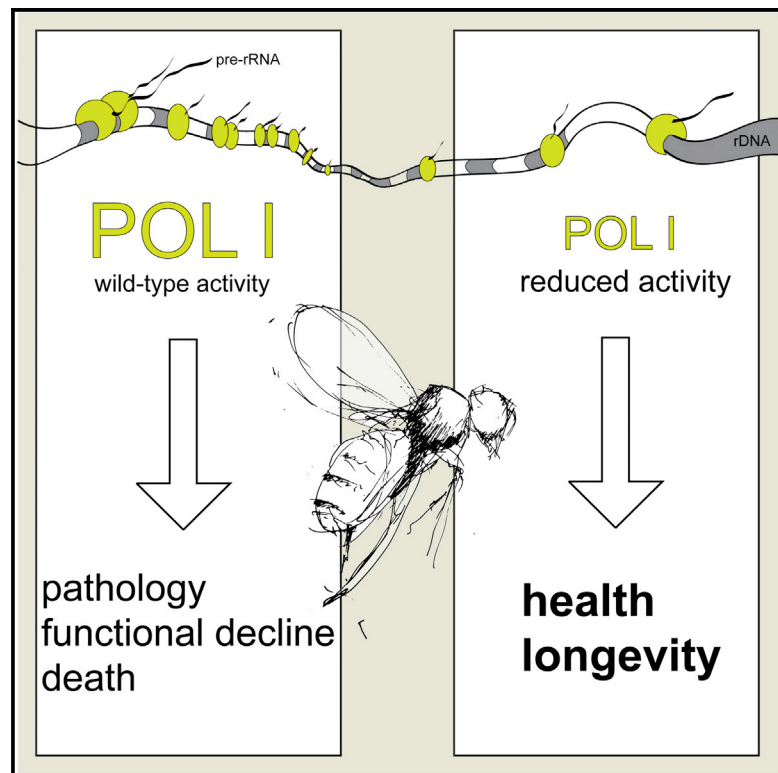

### Authors

Guillermo Martínez Corrales, Danny Filer, Katharina C. Wenz, ..., Yodit Feseha, Susan J. Broughton, Nazif Alic

### Correspondence

n.alic@ucl.ac.uk

### In Brief

RNA polymerase I is a conserved eukaryotic enzyme that transcribes a single gene to generate precursor ribosomal RNA. Martínez Corrales et al. show that reducing the activity of this polymerase, even only in subsets of adult cells, can promote broad health benefits and longevity in the animal model *Drosophila melanogaster*.

### Highlights

- Partial inhibition of RNA polymerase I (Pol I) can extend lifespan in the fruit fly
- Reducing Pol I activity after development and only in the gut is sufficient
- Pol I activity affects aging from both post-mitotic and mitotically active cells
- Pol I activity affects the age-related decline in performance of multiple organs

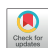

# Partial Inhibition of RNA Polymerase I Promotes Animal Health and Longevity

Guillermo Martínez Corrales,<sup>1,3</sup> Danny Filer,<sup>1,3</sup> Katharina C. Wenz,<sup>1</sup> Abbie Rogan,<sup>1</sup> George Phillips,<sup>1</sup> Mengjia Li,<sup>1</sup> Yodit Feseha,<sup>1</sup> Susan J. Broughton,<sup>2</sup> and Nazif Alic<sup>1,4,\*</sup>

<sup>1</sup>Institute of Healthy Ageing and the Research Department of Genetics, Evolution, and Environment, University College London, WC1E 6BT London, UK

<sup>2</sup>Division of Biomedical and Life Sciences, Faculty of Health and Medicine, Lancaster University, LA1 4YQ Lancaster, UK

<sup>3</sup>These authors contributed equally

<sup>4</sup>Lead Contact

\*Correspondence: [n.alic@ucl.ac.uk](mailto:n.alic@ucl.ac.uk)

<https://doi.org/10.1016/j.celrep.2020.01.017>

## SUMMARY

Health and survival in old age can be improved by changes in gene expression. RNA polymerase (Pol) I is the essential, conserved enzyme whose task is to generate the pre-ribosomal RNA (rRNA). We find that reducing the levels of Pol I activity is sufficient to extend lifespan in the fruit fly. This effect can be recapitulated by partial, adult-restricted inhibition, with both enterocytes and stem cells of the adult midgut emerging as important cell types. In stem cells, Pol I appears to act in the same longevity pathway as Pol III, implicating rRNA synthesis in these cells as the key lifespan determinant. Importantly, reduction in Pol I activity delays broad, age-related impairment and pathology, improving the function of diverse organ systems. Hence, our study shows that Pol I activity in the adult drives systemic, age-related decline in animal health and anticipates mortality.

## INTRODUCTION

Most animals age; their vitality, health, and survival decline as they get older (Martínez, 1998). In humans, age is the main risk factor for the predominant killer and debilitating diseases, including cancer, cardiovascular disease, and neurodegeneration (Christensen et al., 2009; Fontana et al., 2010; López-Otín et al., 2013; Niccoli and Partridge, 2012). Because the proportion of older people in many populations is increasing at an alarming rate (Christensen et al., 2009), identifying mechanisms that can be harnessed to improve human health and well-being in old age is an urgent priority for biomedical research. Over the last three decades, research in basic biogerontology has shown that aging is moldable by identifying fundamental cellular and organismal processes that can be manipulated to extend a healthy lifespan (Alic and Partridge, 2011; López-Otín et al., 2013; Partridge et al., 2018). These processes can often be altered in the adult to achieve longevity by reprogramming gene expression via transcriptional regulation.

The task of transcription in the eukaryotic nucleus is divided between three nuclear RNA polymerases (Pols) (Roeder and Rutter, 1969). Pol I, Pol II, and Pol III have distinct subunit composition, have distinct biochemical properties, and transcribe distinct classes of genes (Roeder and Rutter, 1969; Werner and Grohmann, 2011; Vannini and Cramer, 2012). Pol II-generated transcripts include all protein-coding messenger RNAs (mRNAs) and perform a vast number of cellular functions. The historical focus on Pol II is also observed in aging research, in which the most effort has been invested in understanding how a number of Pol II transcription factors guide pro-longevity transcriptional programs (e.g., Murphy et al., 2003; Hsu et al., 2003; Tepper et al., 2013; Alic et al., 2011, 2014; Dobson et al., 2019). The other two Pols have received much less attention, despite their fundamental cellular roles. We have recently described an evolutionarily conserved role for Pol III in aging (Filer et al., 2017). However, the role of Pol I remains unexplored.

Pol I is the fundamental structurally and functionally conserved eukaryotic enzyme that transcribes a single gene, ribosomal DNA (rDNA) (Vannini and Cramer, 2012). It generates the pre-rRNA that is processed into the mature 18S, 5.8S, and 28S rRNAs, the key structural and catalytic components of the ribosome (Grummt, 2003; Kressler et al., 2017). Even though Pol I has only one task to perform, its activity accounts for a major portion of cellular transcription due to the high cellular demand for rRNA (Grummt, 2003). rDNA is present in hundreds of copies per genome that are organized in large arrays of tandem repeats in one or several genomic locations (Grummt, 2003). Pol I is known to be essential for cellular growth and proliferation and for organismal growth, and it is often deregulated in cancers (Drygin et al., 2010; Grewal et al., 2007; Ghosh et al., 2014; Sriskanthadevan-Pirahas et al., 2018). The focus on this growth-promoting role of Pol I has often precluded investigating its potential function(s) in more complex cellular and animal traits. However, recent work has generated unsuspected insights. For example, Pol I activity in one tissue can promote organismal growth via secreted factors (Ghosh et al., 2014); it can equally affect not only cell proliferation but also cell fate decisions in a stem cell lineage (Zhang et al., 2014). Here, we present evidence that Pol I activity itself is a central cause of aging, affecting survival as well as multiple indices of health in the animal model *Drosophila melanogaster*.

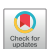

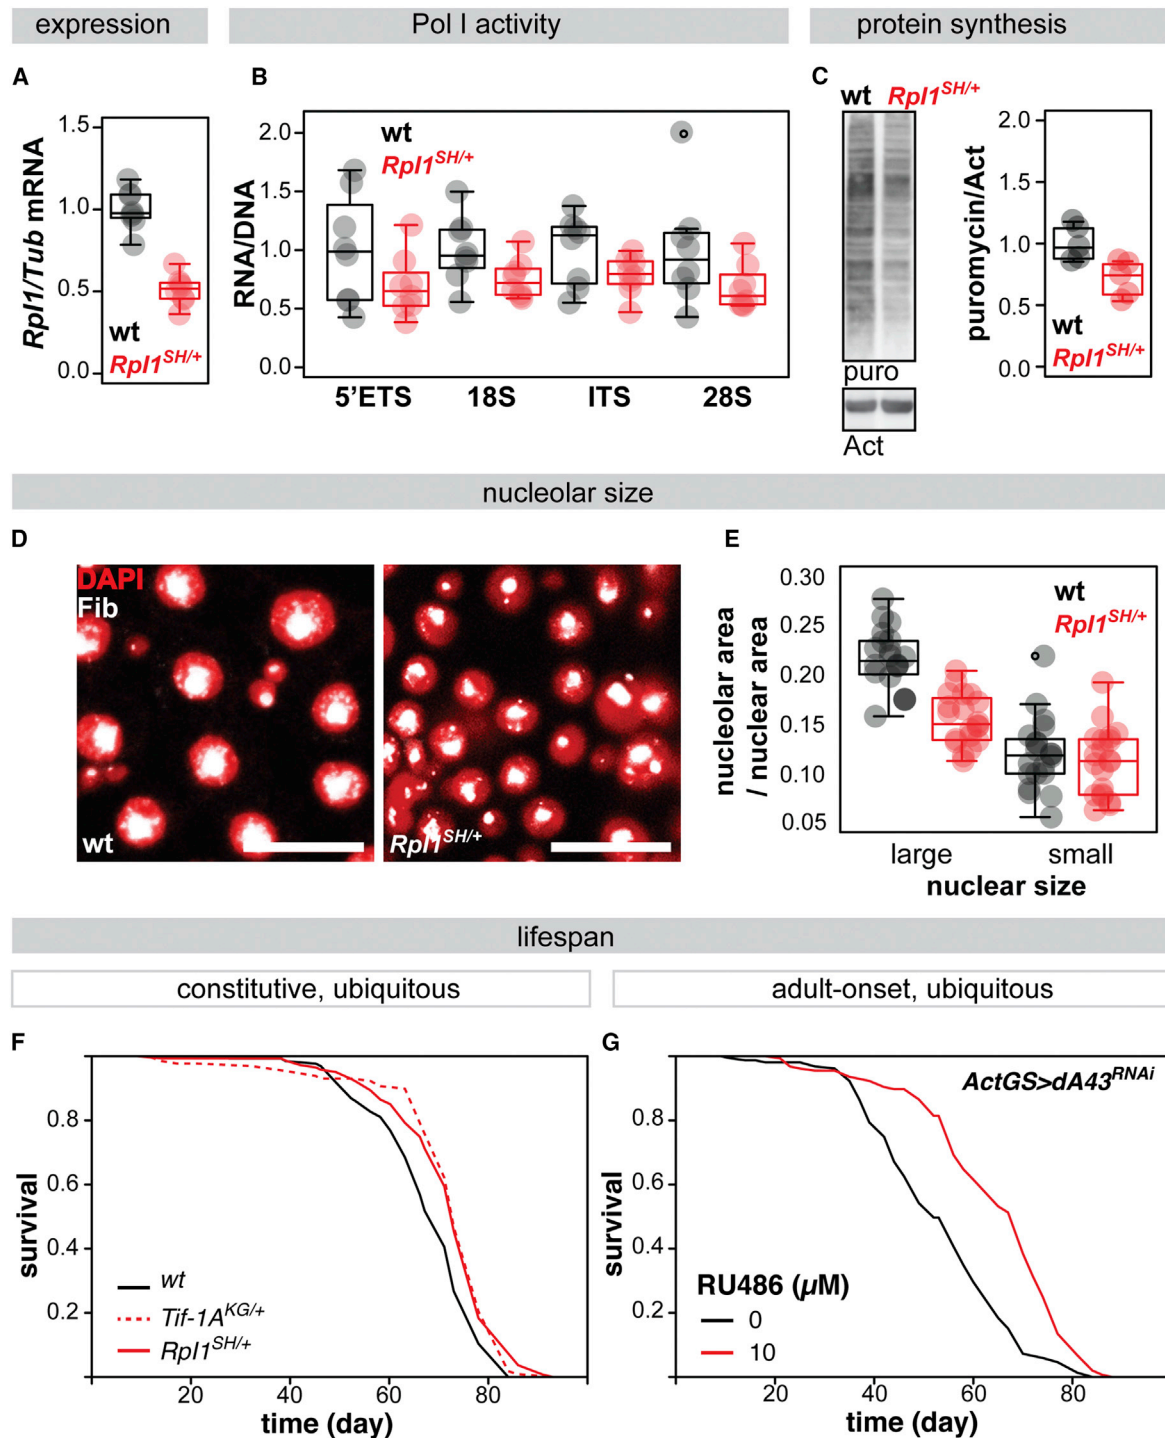

**Figure 1. Reduction in Pol I Activity Extends Fruit Fly Lifespan**

(A) Relative *Rpl1* transcript levels ( $n = 8$  biologically independent samples,  $p < 10^{-4}$ , t test).

(B) Ratio of RNA to DNA for the sequences present in pre-rRNA-rDNA ( $n = 8$  biologically independent samples, effect of genotype  $p = 9 \times 10^{-4}$ , no significant effect of the target sequence or interaction, linear model [LM]).

(C) Relative levels of protein synthesis in whole flies determined by puromycin incorporation and western blotting, showing a representative blot (left) and quantification (right;  $n = 5$  individual flies,  $p = 0.01$ , t test).

(D) Representative images of nucleoli (Fibrillar staining) in posterior midguts (scale bar,  $10 \mu\text{m}$ ).

(legend continued on next page)

## RESULTS

### Pol I Activity in the Adult Limits Animal Lifespan

Pol I is composed of 14 subunits, several of which are specific to the enzyme (Vannini and Cramer, 2012; Fernández-Tornero et al., 2013; Engel et al., 2013). To examine aging in a Pol I loss-of-function mutant, we backcrossed a transposon insertion in the 5' region of the *Rpl1* gene (P-element, SH0507) encoding the largest specific subunit of Pol I (ortholog of the A190 subunit of budding yeast [Figure S1A] and the human POLR1A) into a healthy, outbred, wild-type fly background. The *Rpl1*<sup>SH0507</sup> allele (*Rpl1*<sup>SH</sup> henceforth) is recessive, pre-adult lethal. The viable *Rpl1*<sup>SH/+</sup> adult heterozygote females had a 50% reduction in *Rpl1* mRNA ( $p < 10^{-4}$ ; Figure 1A), while not showing a significant effect on the expression of the neighboring gene *Blos1* ( $p = 0.13$ ; Figure S1B), confirming a substantial and specific effect of the insertion on the expression of *Rpl1*. Pol I activity is essential for animal growth, which in *Drosophila* occurs during the larval stages (Grewal et al., 2007). *Rpl1*<sup>SH/+</sup> females did not weigh substantially less than controls (Figure S1C), indicating that the heterozygous mutation does not impose a major growth impairment.

To examine whether the *Rpl1*<sup>SH/+</sup> adults exhibit phenotypes consistent with partial Pol I inactivation, we examined Pol I activity, rates of protein synthesis, and nucleolar size in the mutants. To characterize Pol I activity, we determined the relative RNA to DNA abundance of sequences present in the pre-rRNA—within the 5' externally transcribed spacer (5'ETS), internally transcribed spacer (ITS), and the mature 18S and 28S rRNA. A 30% overall reduction in this rRNA/rDNA ratio was observed in *Rpl1*<sup>SH/+</sup> adult females ( $p = 9 \times 10^{-4}$  Figure 1B), confirming a partial loss of Pol I activity *in vivo*. Using puromycin incorporation assays, we found that this reduction in rRNA synthesis was accompanied by a reduction in the rates of protein synthesis in individual, whole *Rpl1*<sup>SH/+</sup> females ( $p = 0.01$ ; Figures 1C and S1D).

Pre-rRNA transcription and ribosome biogenesis take place in the nucleolus, a subnuclear compartment whose formation is seeded by the rDNA repeats (Grummt, 2003). Nucleolar size is indicative of the levels of ribosome biogenesis (Tiku and Antebi, 2018; Tiku et al., 2017; Uppaluri et al., 2016). To investigate the cellular consequences of the reduction in Pol I activity in *Rpl1*<sup>SH/+</sup> females, we examined the nucleolar size of the *Drosophila* midgut (equivalent to the mammalian small intestine). This organ harbors cells with a large nucleus, the absorptive, post-mitotic enterocytes (ECs), and two types of cells with smaller nuclei, the enter-

oendocrine cells and the mitotically active intestinal stem cells (ISCs) (Miguel-Aliaga et al., 2018). We assessed whether the relative nucleolar size in gut cells was altered in *Rpl1*<sup>SH/+</sup> females by staining for the nucleolar marker Fibrillarin and analyzing the data with a mixed-effects linear model (LM) to account for different nuclear sizes and intra-individual correlation. We found that *Rpl1*<sup>SH/+</sup> females displayed a reduction in relative nucleolar area compared to controls ( $p = 0.01$ ; Figures 1D and 1E). This reduction was greatest in ECs (genotype-by-nuclear size interaction  $p < 10^{-4}$ ; for a summary of the LM analysis, see Figure S1E). This was possibly due to the higher demand for protein synthesis in ECs, as indicated by their larger relative nucleolar size (Figures 1D and 1E). We did not observe a substantial difference in nuclear size or ploidy (measured as DAPI staining intensity) between the genotypes (Figures S1F and S1G), which is consistent with a limited effect of the heterozygote mutation on fly growth (Figure S1C). In summary, a heterozygous loss-of-function mutant in the gene encoding the largest subunit of Pol I is viable and displays molecular and cellular phenotypes that are consistent with a partial reduction in Pol I activity. We next sought to examine how this reduction in Pol I activity affects aging.

To characterize the role of Pol I activity in aging, we focused on females, whose aging is more malleable and better characterized. We found that *Rpl1*<sup>SH/+</sup> females lived longer than the wild-type controls (Figure 1F). To determine the statistical significance of this observation, we used the log-rank test, which assesses the difference in survival across the lifespan and is highly sensitive. *Rpl1*<sup>SH/+</sup> females were significantly longer lived than the wild-type ( $p = 3 \times 10^{-4}$ ). To confirm that this longevity is due to a reduction in Pol I activity, we used additional, independent genetic reagents. We backcrossed the previously characterized *Tif-1A*<sup>KG06857</sup> allele (*Tif-1A*<sup>KG</sup> henceforth), which abolishes almost completely the expression of the essential activator of Pol I, *Tif-1A*, resulting in a reduction in Pol I activity (Grewal et al., 2007). *Tif-1A*<sup>KG/+</sup> females also showed a significant lifespan extension ( $p = 1 \times 10^{-4}$ ; Figure 1F). Furthermore, the longevity of both *Rpl1*<sup>SH/+</sup> and *Tif-1A*<sup>KG/+</sup> females was robustly observed in three independent experimental trials with an average 8% extension of the median lifespan (Figure S1H). Hence, partial lifelong reduction in Pol I activity extends lifespan.

As Pol I is crucial for fly development (Grewal et al., 2007; Ghosh et al., 2014), the longevity observed in the *Rpl1*<sup>SH/+</sup> or *Tif-1A*<sup>KG/+</sup> females could have resulted from a developmental effect of reduced Pol I activity, such as reduced growth, that influenced the subsequent adult lifespan. To examine the

(E) Quantification of nucleolar size in large or small nuclei (area as proportion of nuclear area;  $n = 1-5$  nucleoli per animal per nuclear size, 4–5 animals where values from the same animal are indicated as vertically aligned points in the boxplot, effect of genotype  $p = 0.01$ , nuclear size  $p < 1 \times 10^{-4}$ , interaction  $p = 2 \times 10^{-4}$ , mixed-effects LM with “animal” as random effect).

(F) Lifespans of *Rpl1*<sup>SH/+</sup> ( $n = 137$  dead/15 censored flies), *Tif-1A*<sup>KG/+</sup> ( $n = 118$  dead/25 censored flies) and wild-type females ( $n = 118$  dead/22 censored flies),  $p = 3 \times 10^{-4}$  and  $1 \times 10^{-4}$ , respectively, log-rank test).

(G) Lifespans of females after ubiquitous induction of *dA43*<sup>RNAi</sup> from day 2 of adulthood by RU486 feeding and controls (–RU486  $n = 154$  dead/4 censored flies, +RU486  $n = 155$  dead/1 censored flies,  $p = 4 \times 10^{-12}$ , log-rank test).

(A)–(E) were assessed in *Rpl1*<sup>SH/+</sup> and wild-type females. Boxplots show means and quintiles, with individual replicate points overlaid.

See also Figures S1 and S2.

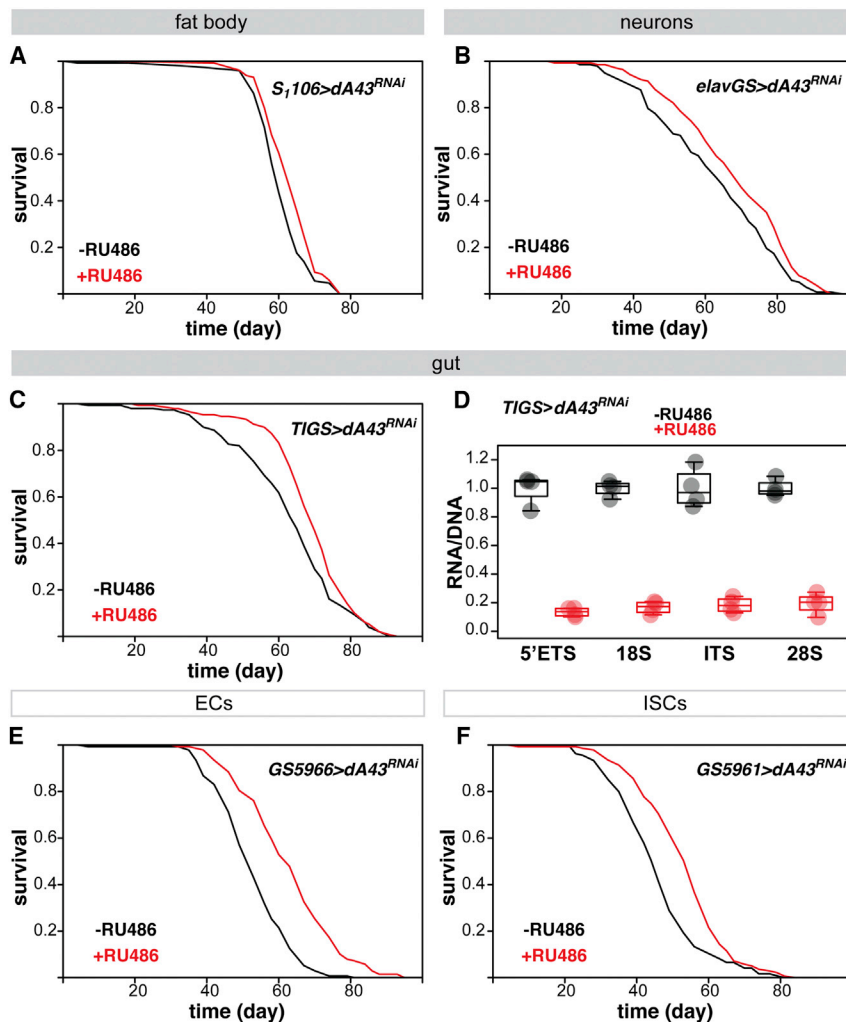

**Figure 2. Tissue- and Cell-Type-Restricted Inhibition of Pol I Promotes Longevity**

(A) Lifespans of females with *dA43<sup>RNAi</sup>* induced in adult fat body and gut by RU486 feeding and controls (–RU486 n = 118 dead/17 censored flies, +RU486 n = 127 dead/12 censored flies, p = 6 × 10<sup>-3</sup>, log-rank test).

(B) Lifespan of females with adult-onset induction of *dA43<sup>RNAi</sup>* in neurons achieved by RU486 feeding (–RU486 n = 138 dead/1 censored flies, +RU486 n = 140 dead/1 censored flies, p = 0.01, log-rank test).

(C) Lifespans of females with *dA43<sup>RNAi</sup>* induced in the adult gut by RU486 feeding and controls (–RU486 n = 149 dead/4 censored flies, +RU486 n = 148 dead/2 censored flies, p = 7 × 10<sup>-3</sup>, log-rank test).

(D) Ratio of RNA to DNA for the sequences present in pre-rRNA-rDNA in fly guts after adult-onset induction of *dA43<sup>RNAi</sup>* (n = 4 biologically independent samples, effect of RU486 p < 10<sup>-4</sup>, no significant effect of the target sequence or interaction, LM). Boxplots show means and quintiles, with individual biological replicate values overlaid as points.

(E) Lifespans of females with *dA43<sup>RNAi</sup>* induced in adult ECs by RU486 feeding and controls (–RU486 n = 135 dead/8 censored flies, +RU486 n = 138 dead/9 censored flies, p = 1 × 10<sup>-13</sup>, log-rank test).

(F) Lifespans of females with *dA43<sup>RNAi</sup>* induced in adult ISCs by RU486 feeding and controls (–RU486 n = 134 dead/2 censored flies, +RU486 n = 139 dead/5 censored flies, p = 6 × 10<sup>-6</sup>, log-rank test).

Fly genotypes are indicated in each panel. See also Figures S2 and S3.

consequence of reducing Pol I activity specifically in adulthood, we targeted either *Tif-1A* or the *Drosophila* gene encoding the Pol I-specific subunit A43 (*dA43*, CG13773; Figure S1A), with RNA interference (RNAi) in combination with inducible, ubiquitous *Actin*- or *daughterless-GeneSwitch* drivers (*ActGS* or *daGS*, respectively) (Osterwalder et al., 2001). The efficacy of the *Tif-1A<sup>RNAi</sup>* line has been demonstrated (Ghosh et al., 2014), and we further confirmed that the ubiquitous expression of either the *dA43<sup>RNAi</sup>* or *Tif-1A<sup>RNAi</sup>* construct during development resulted in lethality, as expected (Figure S2A). Their ubiquitous induction in adulthood, achieved by feeding *ActGS>dA43<sup>RNAi</sup>* or *daGS>Tif-1A<sup>RNAi</sup>* females with the RU486 inducer from day 2 post-eclosion, was enough to extend lifespan (p = 4 × 10<sup>-12</sup> for Figure 1G; see also Figures S2B and S2C). These data indicate that the developmental roles of Pol I, such as promoting growth, are separable from the role of Pol I in longevity, as is the case for the growth-promoting insulin/insulin-like growth factor signaling pathway (Clancy et al., 2001). In addition, RU486 feeding did not have a significant effect on the lifespans of the driver- or transgene-alone controls (Figures S2D–S2G). Note that we tested a range of RU486

together, these experiments reveal that Pol I activity in the adult limits animal lifespan.

**Pol I Activity in Multiple, Distinct Adult Cell Types Affects Organismal Aging**

Pol I could limit lifespan from discrete subsets of adult cells. To map where its activity is relevant to longevity, we induced *dA43<sup>RNAi</sup>* or *Tif-1A<sup>RNAi</sup>* constructs using a panel of tissue- or cell-specific GeneSwitch drivers. Driving the *dA43<sup>RNAi</sup>* or *Tif-1A<sup>RNAi</sup>* constructs in the fat body and midgut (the former being equivalent to mammalian adipose tissue and liver) with the *S<sub>106</sub>* driver or in neurons with *elavGS* showed modest effects, significantly extending lifespan in 2 of 3 and 1 of 2 experimental trials, respectively (p = 6 × 10<sup>-3</sup>, 2 × 10<sup>-4</sup>, and >0.05; Figures 2A, S3A, and S3B; p = 0.01 and >0.05, Figures 2B and S3C), indicating some, albeit moderate, relevance of these tissues. The induction of *dA43<sup>RNAi</sup>* in the fly muscle with *MHCGS* was detrimental (Figure S3D). This adverse effect may reflect a high requirement for protein synthesis to maintain muscle function. In contrast, knocking down Pol I transcriptional machinery in the midgut with the midgut-restricted *TIGS* driver (Poirier et al., 2008) consistently extended lifespan

doses and found that higher doses of the inducer produced a diminished or negative effect (Figures S2B and S2C), indicating that an extensive reduction in Pol I activity may be detrimental. Taken

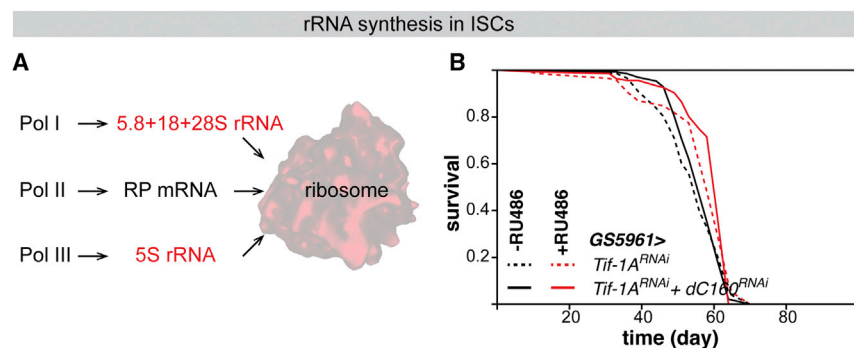

**Figure 3. Pol I and Pol III Act in the Same Longevity Pathway in the ISCs**

(A) Contribution of each Pol to ribosome biogenesis. rRNAs are indicated in red. RP, ribosomal protein. (B) Lifespans of females with *dA43<sup>RNAi</sup>* alone (–RU486 n = 138 dead/6 censored flies, +RU486 n = 137 dead/5 censored flies, p = 0.01, log-rank test) or together with *dC160<sup>RNAi</sup>* (–RU486 n = 99 dead/32 censored flies, +RU486 n = 127 dead/10 censored flies, p =  $2 \times 10^{-5}$ , log-rank test) induced in adult ISCs by RU486 feeding and controls. The lifespans of the two –RU486 or the two +RU486 conditions are not significantly different.

See Figure S4 for *GS5961>dC160<sup>RNAi</sup>* lifespans that were carried out in parallel and the CPH analysis.

( $p < 0.01$ ; Figures 2C and S3E). We confirmed the expected reduction in the pre-rRNA:rDNA ratio in the midgut of *TIGS>dA43<sup>RNAi</sup>* females ( $p = 1 \times 10^{-4}$ ; Figure 2D). Overall, the survey of *Drosophila* tissues indicated that the main longevity effect of Pol I inhibition stems from the midgut, with possible minor contributions from fat body cells and neurons.

The *Drosophila* midgut contains several cell types. Driving *dA43<sup>RNAi</sup>* in the post-mitotic ECs or mitotically active ISCs was sufficient to extend lifespan (*GS5966* and *GS5961* drivers, respectively,  $p < 10^{-5}$ ; Figures 2E and 2F). In all of the cases, RU486 feeding had no effect on the lifespans of driver-alone controls (Figures S3F–S3H). Overall, our data revealed that Pol I activity drives aging from distinct adult cell types. Pol I acts non-redundantly from both post-mitotic cells, such as ECs, and cells with a proliferation potential, the ISCs. We next focused on the ISCs due to their importance in gut homeostasis (Miguel-Aliaga et al., 2018) and the known role of Pol III in these cells (Filer et al., 2017).

### rRNA Biogenesis in the ISCs Limits Lifespan

Ribosome biogenesis is emerging as an important process in the regulation of stem cell behaviors (Zhang et al., 2014; Sanchez et al., 2016). Reduction in Pol I activity in the ISCs may extend lifespan by limiting the provision of rRNAs required for ribosome biogenesis. While Pol I is the only polymerase that transcribes the rDNA locus, it is not the only polymerase that synthesizes rRNA species; 5S rRNA is generated by Pol III (Figure 3A). We have recently shown that Pol III activity in the gut also limits the lifespan in *Drosophila* (Filer et al., 2017). The fly midgut displays sexually dimorphic physiology and aging (Regan et al., 2016; Hudry et al., 2016, 2019), and similar to the effects of Pol III, inhibition of Pol I in the midgut did not extend lifespan in males (Figure S4A). A further similarity between the effects of Pol I and Pol III is that each polymerase limits lifespan from the ISCs (see Figure 2F and Filer et al., 2017). This highlights the ISCs as the midgut cells in which both Pol I and Pol III are relevant to lifespan and highlights rRNA synthesis in the ISCs as a mechanism of longevity downstream of Pol I and Pol III, since the one task shared by both Pols is to provide the full, requisite complement of rRNA species (Kressler et al., 2017).

To further examine the connection between rRNA synthesis and longevity, we directly assessed the genetic interactions between Pol I and Pol III activity in the ISCs for lifespan. If the two Pols do not act through a common longevity mechanism, we would expect the effects of reducing their activity on lifespan

to be additive. We found that inducing the expression of a validated RNAi line against the largest Pol III subunit, *dC160* (Filer et al., 2017), did not further extend lifespan when co-expressed with *Tif-1A<sup>RNAi</sup>* in the ISCs (Figure 3B), while it did when expressed alone in a parallel experiment (Figure S4B). Note that the presence of *UAS-Tif-1A<sup>RNAi</sup>* did not appear to hamper the ability of the *GS5961* driver to induce a second transgene (Figure S4C). For a robust analysis of survival data, we used a Cox proportional hazards (CPH) model, which can assess the statistical significance of individual effects (genotype and presence of RU486) and of their interaction to determine whether the lifespan response to RU486 is altered by the presence of both RNAi lines. CPH analysis confirmed that the lifespan extension obtained by reducing Pol I or Pol III activity individually in the ISCs was not significantly different from that observed when both were targeted simultaneously (Figure S4D). This result is consistent with Pol I and Pol III acting in the same longevity pathway in the ISCs. This conclusion is additionally supported by the known roles of the two polymerases in the same process, namely ribosome biogenesis, and the similar profile of organs whence their activity affects lifespan. While it may be tempting to view one Pol as upstream of the other, such a cascade is unlikely since the three nuclear polymerases appear tightly coordinated for ribosome biogenesis (Martin et al., 2006; Filer et al., 2017; Grummt, 2003).

### Pol I Activity Defines a Central Aging Process with Broad Effects on Health

Having established that a moderate reduction in Pol I activity was sufficient to extend lifespan, we next sought to examine how Pol I activity affects health in old age. Since the midgut appeared critical for longevity, we initially focused on the health and integrity of this organ.

As *Drosophila* females age, the number of mitotic cells in the midgut increases due to ISC hyperproliferation and misdifferentiation (Biteau et al., 2008; Miguel-Aliaga et al., 2018). This age-induced hyperplasia can be monitored by scoring the number of cells harboring phosphorylated histone H3 (pH3). We examined the number of pH3<sup>+</sup> cells in young and old *Rpl1<sup>SHI/+</sup>* females. As for all age-related phenotypes, we analyzed the data using an LM to determine the impact of the mutation on age-related changes (assessed by the significance of the age-by-genotype interaction). We found that *Rpl1<sup>SHI/+</sup>* females displayed a reduction in age-related

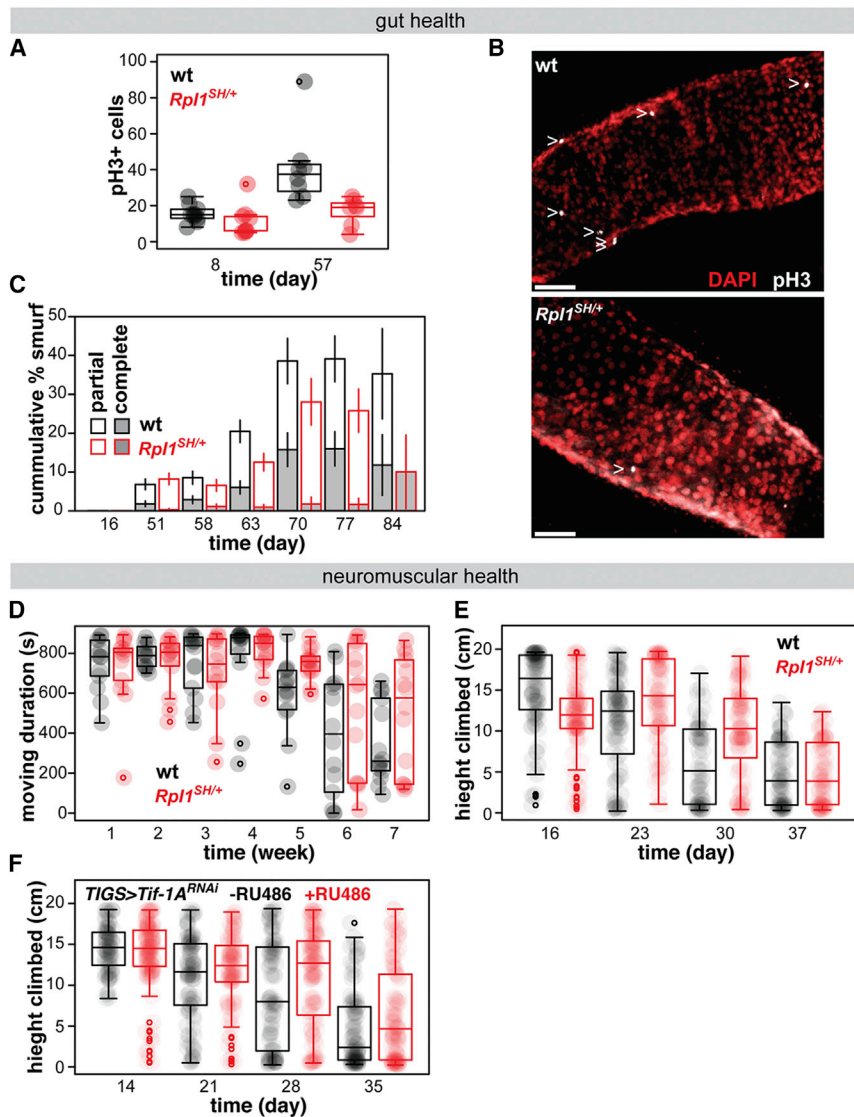

**Figure 4. Reduction in Pol I Activity Improves Gut Health in Old Flies**

(A) Number of pH3<sup>+</sup> cells per gut (n = 8–10 flies, effect of age p = 6 × 10<sup>−4</sup>, genotype p = 3 × 10<sup>−3</sup>, genotype-by-age interaction p = 0.02, LM). Boxplots show means and quintiles, with counts from individual guts overlaid as points.

(B) Representative images of pH3<sup>+</sup> cells in old guts (white > indicates pH3<sup>+</sup> cells, stacks; scale bar, 50 μm).

(C) Cumulative proportion of partial and complete smurfs (means ± SEs, n = 10–378 flies, no significant effect of genotype, age p < 10<sup>−4</sup>, genotype-by-age interaction p < 0.05, ordinal logistic regression).

(D) Moving duration during exploratory walking in *Rpl1<sup>SH/+</sup>* and wild-type females (n = 13–14 flies, effect of genotype not significant, age p < 10<sup>−4</sup>, genotype-by-age interaction p = 0.01, LM).

(E) Height climbed during negative geotaxis assays in *Rpl1<sup>SH/+</sup>* and wild-type females (n = 79–97 flies, no significant effect of genotype, age p < 10<sup>−4</sup>, genotype-by-age interaction p = 1 × 10<sup>−4</sup>, LM).

(F) Height climbed during negative geotaxis assays in *TIGS>Tif-1A<sup>RNAi</sup>* females in the presence or absence of RU486 (n = 90–123 flies, effect of RU486 p = 2.5 × 10<sup>−3</sup>, age p < 10<sup>−4</sup>, genotype-by-age interaction p = 4.8 × 10<sup>−3</sup>, LM).

(A)–(E) were assessed in *Rpl1<sup>SH/+</sup>* and wild-type females. Boxplots show means and quintiles, with values for individual flies overlaid as points. See also Figure S4.

hyperplasia in the gut, relative to wild type (p = 0.02 for age-by-genotype interaction; Figures 4A and 4B). Note that the pronounced difference in the number of dividing cells between wild-type and mutant females was specifically observed in older flies (Figure 4A), indicating that it is due to the prevention of a pathology, rather than a substantial alteration of ISC function under homeostatic conditions.

In addition and linked to this hyperproliferative phenotype, the ability of the fly gut to act as a barrier becomes compromised during aging (Rera et al., 2012; Clark et al., 2015; Miguel-Aliaga et al., 2018). The age-related loss of gut barrier function can be measured as the ability to exclude an orally administered dye from the body cavity. We performed the previously described “smurf” assays (Rera et al., 2012) and found that this loss of gut barrier function was delayed in *Rpl1<sup>SH/+</sup>* females relative to controls (p < 0.05 for age-by-genotype interaction; Figure 4C). Hence, a moderate reduction in Pol I activity delays multiple, interlinked aspects of intestinal aging.

examined the age-related changes in the performance of the neuromuscular system in *Rpl1<sup>SH/+</sup>* and wild-type females.

When placed into a new environment, flies display a complex, spontaneous locomotor behavior called exploratory walking. The performance of this behavior is negatively influenced by age and is indicative of declining brain and locomotor function (Ismail et al., 2015). We characterized the walking behavior of *Rpl1<sup>SH/+</sup>* and wild-type females over 7 weeks. In *Rpl1<sup>SH/+</sup>* females, age-related changes in some parameters of exploratory walking were delayed relative to wild type, and specifically, the age-induced decrease in the time spent walking (walking duration) was significantly rescued in the heterozygous mutants (p = 0.01 for age-by-genotype interaction; Figure 4D). While not all of the parameters were significantly improved (Figures S4E–S4H), the observed beneficial effect on walking duration indicates a better preservation of aspects of brain function in aged *Rpl1<sup>SH/+</sup>* females.

We next examined negative geotaxis as a complementary assay of neuromuscular function. This is an induced escape response

that also diminishes with age and can be measured as the ability to climb a vertical surface (Gargano et al., 2005). The age-related decline in climbing ability was delayed in *Rpl1<sup>SH/+</sup>* females relative to wild type ( $p = 1 \times 10^{-4}$  for age-by-genotype interaction; Figure 4E). This delay could also be observed upon knock down of *Tif-1A* specifically in the adult midgut ( $p = 4.8 \times 10^{-3}$  for age-by-genotype interaction; Figure 4F), indicating that Pol I activity in one organ can affect the health of another. Since the decline in climbing ability appears to precede any obvious gut pathology (compare Figures 4A–4C with 4D–4F), it is unlikely that the rescue of age-related gut pathology directly causes an improvement in climbing. Overall, *Rpl1<sup>SH/+</sup>* females appear to better maintain their neuromuscular system with age. Considering this together with the observed improvements in age-related gut function, Pol I activity emerges as a common driver of several, apparently unrelated, age-induced deficits in multiple organ systems.

## DISCUSSION

Previous studies have linked eukaryotic aging to the rDNA locus (Tiku and Antebi, 2018). rDNA integrity and stability have been causally implicated in replicative aging in yeast (Sinclair and Guarente, 1997; Kaeberlein et al., 1999; Defossez et al., 1999). More recently, small nucleolar size and reduced expression from the rDNA locus have been highlighted as a common feature of numerous distinct long-lived models from a range of animal species (Tiku et al., 2017; Tiku and Antebi, 2018). In old mice, the nucleoli of hematopoietic stem cells accumulate persistent markers of replication stress that may impede rDNA transcription (Flach et al., 2014), while rDNA copies are lost in aging male fly germline stem cells (Lu et al., 2018). In addition, mouse rDNA may be the site of epigenetic regulation that allows early-life nutrition to program adult physiology and health (Holland et al., 2016). While rDNA and the nucleolus have been linked to aging in several contexts, the role of Pol I has not been thoroughly assessed. In yeast, extrachromosomal rDNA circles accumulate during aging and have recently been reported to drive an excessive rise in Pol I activity, which appears to impair nuclear homeostasis (Morlot et al., 2019). Our study demonstrates that the activity of Pol I itself contributes to aging in the fruit fly. Hence, our findings shed a new light on previous observations linking aging to the rDNA locus, nucleolar structure, and nucleolar function, suggesting that they may be causally connected by Pol I activity. The relevance of this finding is further highlighted by the possibility of the pharmacological inhibition of Pol I activity, with several inhibitors developed (for examples, see Drygin et al., 2010; Wei et al., 2018) that may be harnessed for improved health in older ages.

We present evidence that in the fly ISCs, Pol I acts on animal aging through rRNA biogenesis, a fundamental cellular process that is likely to alter stem cell behaviors in diverse settings (Zhang et al., 2014; Sanchez et al., 2016). Interestingly, this also implicates 5S rRNA biogenesis as a longevity-limiting process downstream of Pol III in the ISCs. Both inhibition of Pol III and its activation have been reported to extend lifespan (Filer et al., 2017; Bonhoure et al., 2015). It is possible that Pol III inhibition achieves its health benefits through limiting 5S rRNA synthesis,

while activation may be beneficial due to the metabolic effects of futile tRNA cycling (Willis et al., 2018). Furthermore, the two interventions may be acting from different adult cell types, with Pol III inhibition beneficial in stem cells and activation in differentiated cells, for example.

While rRNA biogenesis appears to be the key process for lifespan in the ISCs, additional mechanisms underlying longevity resulting from Pol I inhibition cannot be excluded in this or other cell types. For example, high levels of transcription of the rDNA locus are thought to make it vulnerable to DNA damage (Tiku and Antebi, 2018; Takeuchi et al., 2003). Reducing Pol I activity may reduce the susceptibility of this locus to age-related DNA damage and instability; Pol I activity is also required for the correct assembly of the nucleolus (Falahati et al., 2016) and may affect a range of nucleolar functions. Indeed, processes other than rRNA biogenesis, such as genomic instability or altered nucleolar function, are likely to be important in at least some adult cell types in which Pol I activity is a determinant of aging.

In addition, Pol I may be relevant in many contexts. Pol I activity is essential for cell growth and proliferation; the growth- and proliferation-simulating PI3K-AKT-TOR and Ras-RAF-ERK signaling pathways, as well as the transcription factor Myc, converge to activate Pol I transcription (Kusnadi et al., 2015). The inhibition of each of these Pol I activators is now known to extend animal lifespans (López-Otín et al., 2013; Slack et al., 2015; Greer et al., 2013; Harrison et al., 2009; Hofmann et al., 2015), indicating that, similar to Pol I, their activity limits the lifespan of the wild-type animal. It is tempting to speculate that these longevity interventions act in part by reducing Pol I activity and that Pol I bridges between these pathways and the rDNA locus. Furthermore, consistent with the antagonistic pleiotropy theory of the evolution of lifespan (Williams, 1957), it is likely that Pol I activity in the wild-type animal is set at levels that are required for development and reproduction at the expense of later life health and survival.

## STAR★METHODS

Detailed methods are provided in the online version of this paper and include the following:

- KEY RESOURCES TABLE
- LEAD CONTACT AND MATERIALS AVAILABILITY
- EXPERIMENTAL MODEL AND SUBJECT DETAILS
- METHOD DETAILS
  - Fly husbandry and lifespan assays
  - Weight measurements
  - Exploratory walking assays
  - Negative geotaxis assays
  - Smurf assays
  - Immunocytochemistry
  - PH3 quantification, nucleolar measurements, and DAPI intensity quantification
  - RNA, DNA extraction and qPCR
  - Assessing developmental lethality
  - Puromycin incorporation assays
- QUANTIFICATION AND STATISTICAL ANALYSIS
- DATA CODE AND AVAILABILITY



## SUPPLEMENTAL INFORMATION

Supplemental Information can be found online at <https://doi.org/10.1016/j.celrep.2020.01.017>.

## ACKNOWLEDGMENTS

The authors thank B. Ohlstein, L. Partridge, S. Pletcher, and J. Tower for fly lines; S.F. Pediconi and B. Schonfeldova for technical assistance; J. Tullet, A. Dobson, and T. Niccoli for critical reading of the manuscript; and the IHA members for support, comments, and discussion throughout this project. Reagents were obtained from the Vienna *Drosophila* Resource Centre and the Bloomington *Drosophila* Stock Center. This work was funded in part by Biotechnology and Biological Sciences Research Council grants BB/M029093/1 and BB/R014507/1, Royal Society grant RG140694, and Medical Research Council grant MR/L018802/1 to N.A. D.F. is a recipient of the UCL Impact PhD studentship.

## AUTHOR CONTRIBUTIONS

N.A. devised the study. D.F., G.M.C., K.C.W., A.R., G.P., M.L., Y.F., S.J.B., and N.A. designed, performed, and analyzed experiments. N.A. supervised D.F., G.M.C., K.C.W., A.R., G.P., M.L., and Y.F. G.M.C., N.A., and S.J.B. wrote the manuscript, with contributions from K.C.W. and D.F.

## DECLARATION OF INTERESTS

The authors declare no competing interests.

Received: August 6, 2019

Revised: November 12, 2019

Accepted: January 3, 2020

Published: February 11, 2020

## REFERENCES

- Alic, N., and Partridge, L. (2011). Death and dessert: nutrient signalling pathways and ageing. *Curr. Opin. Cell Biol.* **23**, 738–743.
- Alic, N., Andrews, T.D., Giannakou, M.E., Papatheodorou, I., Slack, C., Hoddinott, M.P., Cochemé, H.M., Schuster, E.F., Thornton, J.M., and Partridge, L. (2011). Genome-wide dFOXO targets and topology of the transcriptomic response to stress and insulin signalling. *Mol. Syst. Biol.* **7**, 502.
- Alic, N., Giannakou, M.E., Papatheodorou, I., Hoddinott, M.P., Andrews, T.D., Bolukbasi, E., and Partridge, L. (2014). Interplay of dFOXO and two ETS-family transcription factors determines lifespan in *Drosophila melanogaster*. *PLoS Genet.* **10**, e1004619.
- Bass, T.M., Grandison, R.C., Wong, R., Martinez, P., Partridge, L., and Piper, M.D. (2007). Optimization of dietary restriction protocols in *Drosophila*. *J. Gerontol. A Biol. Sci. Med. Sci.* **62**, 1071–1081.
- Biteau, B., Hochmuth, C.E., and Jasper, H. (2008). JNK activity in somatic stem cells causes loss of tissue homeostasis in the aging *Drosophila* gut. *Cell Stem Cell* **3**, 442–455.
- Bonhoure, N., Byrnes, A., Moir, R.D., Hodroj, W., Preitner, F., Praz, V., Marcellin, G., Chua, S.C., Jr., Martinez-Lopez, N., Singh, R., et al. (2015). Loss of the RNA polymerase III repressor MAF1 confers obesity resistance. *Genes Dev.* **29**, 934–947.
- Christensen, K., Doblhammer, G., Rau, R., and Vaupel, J.W. (2009). Ageing populations: the challenges ahead. *Lancet* **374**, 1196–1208.
- Clancy, D.J., Gems, D., Harshman, L.G., Oldham, S., Stocker, H., Hafen, E., Leivers, S.J., and Partridge, L. (2001). Extension of life-span by loss of CHICO, a *Drosophila* insulin receptor substrate protein. *Science* **292**, 104–106.
- Clark, R.I., Salazar, A., Yamada, R., Fitz-Gibbon, S., Morselli, M., Alcaraz, J., Rana, A., Rera, M., Pellegrini, M., Ja, W.W., and Walker, D.W. (2015). Distinct Shifts in Microbiota Composition during *Drosophila* Aging Impair Intestinal Function and Drive Mortality. *Cell Rep.* **12**, 1656–1667.
- Defossez, P.A., Prusty, R., Kaeberlein, M., Lin, S.J., Ferrigno, P., Silver, P.A., Keil, R.L., and Guarente, L. (1999). Elimination of replication block protein Fob1 extends the life span of yeast mother cells. *Mol. Cell* **3**, 447–455.
- Dobson, A.J., Boulton-McDonald, R., Houchou, L., Svermova, T., Ren, Z., Subrini, J., Vazquez-Prada, M., Hoti, M., Rodriguez-Lopez, M., Ibrahim, R., et al. (2019). Longevity is determined by ETS transcription factors in multiple tissues and diverse species. *PLoS Genet.* **15**, e1008212.
- Drygin, D., Rice, W.G., and Grummt, I. (2010). The RNA polymerase I transcription machinery: an emerging target for the treatment of cancer. *Annu. Rev. Pharmacol. Toxicol.* **50**, 131–156.
- Engel, C., Sainsbury, S., Cheung, A.C., Kostrewa, D., and Cramer, P. (2013). RNA polymerase I structure and transcription regulation. *Nature* **502**, 650–655.
- Falahati, H., Pelham-Webb, B., Blythe, S., and Wieschaus, E. (2016). Nucleation by rRNA Dictates the Precision of Nucleolus Assembly. *Curr. Biol.* **26**, 277–285.
- Fernández-Tornero, C., Moreno-Morcillo, M., Rashid, U.J., Taylor, N.M., Ruiz, F.M., Gruene, T., Legrand, P., Steuerwald, U., and Müller, C.W. (2013). Crystal structure of the 14-subunit RNA polymerase I. *Nature* **502**, 644–649.
- Filer, D., Thompson, M.A., Takhaviev, V., Dobson, A.J., Kotronaki, I., Green, J.W.M., Heinemann, M., Tullet, J.M.A., and Alic, N. (2017). RNA polymerase III limits longevity downstream of TORC1. *Nature* **552**, 263–267.
- Flach, J., Bakker, S.T., Mohrin, M., Conroy, P.C., Pietras, E.M., Reynaud, D., Alvarez, S., Diolaiti, M.E., Ugarte, F., Forsberg, E.C., et al. (2014). Replication stress is a potent driver of functional decline in ageing haematopoietic stem cells. *Nature* **512**, 198–202.
- Fontana, L., Partridge, L., and Longo, V.D. (2010). Extending healthy life span—from yeast to humans. *Science* **328**, 321–326.
- Ford, D., Hoe, N., Landis, G.N., Tozer, K., Luu, A., Bhole, D., Badrinath, A., and Tower, J. (2007). Alteration of *Drosophila* life span using conditional, tissue-specific expression of transgenes triggered by doxycycline or RU486/Mifepristone. *Exp. Gerontol.* **42**, 483–497.
- Gargano, J.W., Martin, I., Bhandari, P., and Grotewiel, M.S. (2005). Rapid iterative negative geotaxis (RING): a new method for assessing age-related locomotor decline in *Drosophila*. *Exp. Gerontol.* **40**, 386–395.
- Gems, D. (2015). The aging-disease false dichotomy: understanding senescence as pathology. *Front. Genet.* **6**, 212.
- Ghosh, A., Rideout, E.J., and Grewal, S.S. (2014). TIF-IA-dependent regulation of ribosome synthesis in *Drosophila* muscle is required to maintain systemic insulin signaling and larval growth. *PLoS Genet.* **10**, e1004750.
- Greer, C., Lee, M., Westerhof, M., Milholland, B., Spokony, R., Vijg, J., and Secombe, J. (2013). Myc-dependent genome instability and lifespan in *Drosophila*. *PLoS One* **8**, e74641.
- Grewal, S.S., Evans, J.R., and Edgar, B.A. (2007). *Drosophila* TIF-IA is required for ribosome synthesis and cell growth and is regulated by the TOR pathway. *J. Cell Biol.* **179**, 1105–1113.
- Grummt, I. (2003). Life on a planet of its own: regulation of RNA polymerase I transcription in the nucleolus. *Genes Dev.* **17**, 1691–1702.
- Harrison, D.E., Strong, R., Sharp, Z.D., Nelson, J.F., Astle, C.M., Flurkey, K., Nadon, N.L., Wilkinson, J.E., Frenkel, K., Carter, C.S., et al. (2009). Rapamycin fed late in life extends lifespan in genetically heterogeneous mice. *Nature* **460**, 392–395.
- Hofmann, J.W., Zhao, X., De Cecco, M., Peterson, A.L., Pagliaroli, L., Manivannan, J., Hubbard, G.B., Ikeno, Y., Zhang, Y., Feng, B., et al. (2015). Reduced expression of MYC increases longevity and enhances healthspan. *Cell* **160**, 477–488.
- Holland, M.L., Lowe, R., Caton, P.W., Gemma, C., Carbajosa, G., Danson, A.F., Carpenter, A.A., Loche, E., Ozanne, S.E., and Rakan, V.K. (2016). Early-life nutrition modulates the epigenetic state of specific rDNA genetic variants in mice. *Science* **353**, 495–498.
- Hsu, A.L., Murphy, C.T., and Kenyon, C. (2003). Regulation of aging and age-related disease by DAF-16 and heat-shock factor. *Science* **300**, 1142–1145.

- Hudry, B., Khadayate, S., and Miguel-Aliaga, I. (2016). The sexual identity of adult intestinal stem cells controls organ size and plasticity. *Nature* 530, 344–348.
- Hudry, B., De Goeij, E., Mineo, A., Gaspar, P., Hadjieconomou, D., Studd, C., Mokochinski, J.B., Kramer, H.B., Placais, P.Y., Preat, T., and Miguel-Aliaga, I. (2019). Sex Differences in Intestinal Carbohydrate Metabolism Promote Food Intake and Sperm Maturation. *Cell* 178, 901–918.e16.
- Ismail, M.Z., Hodges, M.D., Boylan, M., Achall, R., Shirras, A., and Broughton, S.J. (2015). The *Drosophila* insulin receptor independently modulates lifespan and locomotor senescence. *PLoS One* 10, e0125312.
- Kaeberlein, M., McVey, M., and Guarente, L. (1999). The SIR2/3/4 complex and SIR2 alone promote longevity in *Saccharomyces cerevisiae* by two different mechanisms. *Genes Dev.* 13, 2570–2580.
- Kressler, D., Hurt, E., and Baßler, J. (2017). A Puzzle of Life: Crafting Ribosomal Subunits. *Trends Biochem. Sci.* 42, 640–654.
- Kusnadi, E.P., Hannan, K.M., Hicks, R.J., Hannan, R.D., Pearson, R.B., and Kang, J. (2015). Regulation of rDNA transcription in response to growth factors, nutrients and energy. *Gene* 556, 27–34.
- Larionov, A., Krause, A., and Miller, W. (2005). A standard curve based method for relative real time PCR data processing. *BMC Bioinformatics* 6, 62.
- López-Otín, C., Blasco, M.A., Partridge, L., Serrano, M., and Kroemer, G. (2013). The hallmarks of aging. *Cell* 153, 1194–1217.
- Lu, K.L., Nelson, J.O., Watase, G.J., Warsinger-Pepe, N., and Yamashita, Y.M. (2018). Transgenerational dynamics of rDNA copy number in *Drosophila* male germline stem cells. *eLife* 7, e32421.
- Martin, J.R. (2004). A portrait of locomotor behaviour in *Drosophila* determined by a video-tracking paradigm. *Behav. Processes* 67, 207–219.
- Martin, D.E., Powers, T., and Hall, M.N. (2006). Regulation of ribosome biogenesis: where is TOR? *Cell Metab.* 4, 259–260.
- Martínez, D.E. (1998). Mortality patterns suggest lack of senescence in hydra. *Exp. Gerontol.* 33, 217–225.
- Mathur, D., Bost, A., Driver, I., and Ohlstein, B. (2010). A transient niche regulates the specification of *Drosophila* intestinal stem cells. *Science* 327, 210–213.
- Miguel-Aliaga, I., Jasper, H., and Lemaître, B. (2018). Anatomy and Physiology of the Digestive Tract of *Drosophila melanogaster*. *Genetics* 210, 357–396.
- Morlot, S., Song, J., Leger-Silvestre, I., Matifas, A., Gadal, O., and Charvin, G. (2019). Excessive rDNA Transcription Drives the Disruption in Nuclear Homeostasis during Entry into Senescence in Budding Yeast. *Cell Rep.* 28, 408–422.e4.
- Murphy, C.T., McCarroll, S.A., Bargmann, C.I., Fraser, A., Kamath, R.S., Ahringer, J., Li, H., and Kenyon, C. (2003). Genes that act downstream of DAF-16 to influence the lifespan of *Caenorhabditis elegans*. *Nature* 424, 277–283.
- Niccoli, T., and Partridge, L. (2012). Ageing as a risk factor for disease. *Curr. Biol.* 22, R741–R752.
- Niccoli, T., Cabecinha, M., Tillmann, A., Kerr, F., Wong, C.T., Cardenas, D., Vincent, A.J., Bettedi, L., Li, L., Grönke, S., et al. (2016). Increased Glucose Transport into Neurons Rescues A $\beta$  Toxicity in *Drosophila*. *Curr. Biol.* 26, 2291–2300.
- Osterwalder, T., Yoon, K.S., White, B.H., and Keshishian, H. (2001). A conditional tissue-specific transgene expression system using inducible GAL4. *Proc. Natl. Acad. Sci. USA* 98, 12596–12601.
- Partridge, L., Deelen, J., and Slagboom, P.E. (2018). Facing up to the global challenges of ageing. *Nature* 561, 45–56.
- Poirier, L., Shane, A., Zheng, J., and Seroude, L. (2008). Characterization of the *Drosophila* gene-switch system in aging studies: a cautionary tale. *Aging Cell* 7, 758–770.
- Regan, J.C., Khericha, M., Dobson, A.J., Bolukbasi, E., Rattanavirotkul, N., and Partridge, L. (2016). Sex difference in pathology of the ageing gut mediates the greater response of female lifespan to dietary restriction. *eLife* 5, e10956.
- Rera, M., Clark, R.I., and Walker, D.W. (2012). Intestinal barrier dysfunction links metabolic and inflammatory markers of aging to death in *Drosophila*. *Proc. Natl. Acad. Sci. USA* 109, 21528–21533.
- Roeder, R.G., and Rutter, W.J. (1969). Multiple forms of DNA-dependent RNA polymerase in eukaryotic organisms. *Nature* 224, 234–237.
- Sanchez, C.G., Teixeira, F.K., Czech, B., Preall, J.B., Zamparini, A.L., Seifert, J.R., Malone, C.D., Hannon, G.J., and Lehmann, R. (2016). Regulation of Ribosome Biogenesis and Protein Synthesis Controls Germline Stem Cell Differentiation. *Cell Stem Cell* 18, 276–290.
- Schindelin, J., Arganda-Carreras, I., Frise, E., Kaynig, V., Longair, M., Pietzsch, T., Preibisch, S., Rueden, C., Saalfeld, S., Schmid, B., et al. (2012). Fiji: an open-source platform for biological-image analysis. *Nat. Methods* 9, 676–682.
- Sinclair, D.A., and Guarente, L. (1997). Extrachromosomal rDNA circles—a cause of aging in yeast. *Cell* 91, 1033–1042.
- Slack, C., Alic, N., Foley, A., Cabecinha, M., Hoddinott, M.P., and Partridge, L. (2015). The Ras-Erk-ETS-Signaling Pathway Is a Drug Target for Longevity. *Cell* 162, 72–83.
- Srikanthadevan-Pirahas, S., Lee, J., and Grewal, S.S. (2018). The EGF/Ras pathway controls growth in *Drosophila* via ribosomal RNA synthesis. *Dev. Biol.* 439, 19–29.
- Takeuchi, Y., Horiuchi, T., and Kobayashi, T. (2003). Transcription-dependent recombination and the role of fork collision in yeast rDNA. *Genes Dev.* 17, 1497–1506.
- Tepper, R.G., Ashraf, J., Kaletsky, R., Kleemann, G., Murphy, C.T., and Bussemaker, H.J. (2013). PQM-1 complements DAF-16 as a key transcriptional regulator of DAF-2-mediated development and longevity. *Cell* 154, 676–690.
- Tiku, V., and Antebi, A. (2018). Nucleolar Function in Lifespan Regulation. *Trends Cell Biol.* 28, 662–672.
- Tiku, V., Jain, C., Raz, Y., Nakamura, S., Heestand, B., Liu, W., Späth, M., Suchiman, H.E.D., Müller, R.U., Slagboom, P.E., et al. (2017). Small nucleoli are a cellular hallmark of longevity. *Nat. Commun.* 8, 16083.
- Tricoire, H., Battisti, V., Trannoy, S., Lasbleiz, C., Pret, A.M., and Monnier, V. (2009). The steroid hormone receptor EcR finely modulates *Drosophila* lifespan during adulthood in a sex-specific manner. *Mech. Ageing Dev.* 130, 547–552.
- Uppaluri, S., Weber, S.C., and Brangwynne, C.P. (2016). Hierarchical Size Scaling during Multicellular Growth and Development. *Cell Rep.* 17, 345–352.
- Vannini, A., and Cramer, P. (2012). Conservation between the RNA polymerase I, II, and III transcription initiation machineries. *Mol. Cell* 45, 439–446.
- Wei, T., Najmi, S.M., Liu, H., Peltonen, K., Kucerova, A., Schneider, D.A., and Laiho, M. (2018). Small-Molecule Targeting of RNA Polymerase I Activates a Conserved Transcription Elongation Checkpoint. *Cell Rep.* 23, 404–414.
- Werner, F., and Grohmann, D. (2011). Evolution of multisubunit RNA polymerases in the three domains of life. *Nat. Rev. Microbiol.* 9, 85–98.
- Williams, G.C. (1957). Pleiotropy, Natural-Selection, and the Evolution of Senescence. *Evolution* 11, 398–411.
- Willis, I.M., Moir, R.D., and Hernandez, N. (2018). Metabolic programming a lean phenotype by deregulation of RNA polymerase III. *Proc. Natl. Acad. Sci. USA* 115, 12182–12187.
- Zhang, Q., Shalaby, N.A., and Buszczak, M. (2014). Changes in rRNA transcription influence proliferation and cell fate within a stem cell lineage. *Science* 343, 298–301.

## STAR★METHODS

### KEY RESOURCES TABLE

| REAGENT or RESOURCE                                           | SOURCE                                                                       | IDENTIFIER                       |
|---------------------------------------------------------------|------------------------------------------------------------------------------|----------------------------------|
| <b>Antibodies</b>                                             |                                                                              |                                  |
| Mouse polyclonal Anti-Fibrillarin antibody                    | Abcam                                                                        | Cat. #ab5821; RRID:AB_2105785    |
| Rabbit polyclonal Phospho-Histone H3 (Ser10) Antibody         | Cell Signaling                                                               | Cat. #9701; RRID:AB_331535       |
| GFP Polyclonal Antibody, Alexa Fluor 488                      | Thermo Fisher Scientific                                                     | Cat. # A-21311; RRID:AB_221477   |
| Alexa Fluor 594 Donkey anti-Rabbit IgG H&L Secondary Antibody | Thermo Fisher Scientific                                                     | Cat. A-21207; RRID:AB_141637     |
| Alexa Fluor 488 Donkey anti-Mouse IgG H&L Secondary Antibody  | Thermo Fisher Scientific                                                     | Cat. A-21202; RRID:AB_141607     |
| Anti-beta Actin antibody                                      | Abcam                                                                        | Cat. #8224; RRID:AB_449644       |
| Anti-Puromycin antibody, clone 12D10                          | Millipore                                                                    | Cat. #MABE343MI; RRID:AB_2566826 |
| Goat Anti-Mouse IgG H&L (HRP) Antibody                        | Abcam                                                                        | Cat. # ab6789; RRID:AB_955439    |
| <b>Chemicals, Peptides, and Recombinant Proteins</b>          |                                                                              |                                  |
| FD&C Blue dye No.1                                            | Fastcolors                                                                   | CI: 42090 CAS Number: 3844-45-9  |
| Vectashield with DAPI                                         | Vector Laboratories                                                          | Cat# H-1200; RRID:AB_2336790     |
| TRIzol Reagent                                                | Thermo Fisher Scientific                                                     | Cat. #15596026                   |
| Schneider's <i>Drosophila</i> medium                          | Sigma                                                                        | # S0146                          |
| RJ <sup>486</sup>                                             | Sigma                                                                        | #M8046                           |
| Puromycin                                                     | GIBCO                                                                        | #A1113803                        |
| <b>Critical Commercial Assays</b>                             |                                                                              |                                  |
| NuPAGE 4-12% Bis-Tris Protein Gel                             | Invitrogen                                                                   | #NP0322BOX                       |
| SYBR Green PCR Master Mix                                     | Applied Biosystems                                                           | Cat. # 4309155                   |
| SuperScript II Reverse Transcriptase                          | Thermo Fisher Scientific                                                     | Cat. #18064014                   |
| <b>Experimental Models: Organisms/Strains</b>                 |                                                                              |                                  |
| <i>D. melanogaster</i> : w <sup>Dah</sup>                     | This lab / Linda Partridge                                                   | N/A                              |
| <i>D. melanogaster</i> : w <sup>1118</sup>                    | Bloomington <i>Drosophila</i> Stock Centre                                   | RRID:BDSC_3605                   |
| <i>D. melanogaster</i> MSCGS driver                           | <a href="#">Poirier et al., 2008</a>                                         | N/A                              |
| <i>D. melanogaster</i> TIGS driver                            | <a href="#">Poirier et al., 2008</a>                                         | N/A                              |
| <i>D. melanogaster</i> S <sub>1</sub> 106 driver              | <a href="#">Poirier et al., 2008</a>                                         | N/A                              |
| <i>D. melanogaster</i> GS5961 driver                          | <a href="#">Mathur et al., 2010</a>                                          | N/A                              |
| <i>D. melanogaster</i> GS5966 driver                          | <a href="#">Mathur et al., 2010</a>                                          | N/A                              |
| <i>elav</i> <sup>GS</sup>                                     | <a href="#">Niccoli et al., 2016</a> ; <a href="#">Tricoire et al., 2009</a> | N/A                              |
| <i>daughterless</i> <sup>GeneSwitch</sup>                     | <a href="#">Tricoire et al., 2009</a>                                        | N/A                              |
| <i>Actin</i> <sup>GeneSwitch</sup>                            | <a href="#">Alic et al., 2011</a> ; <a href="#">Ford et al., 2007</a>        | N/A                              |
| <i>daughterless</i> <sup>GAL4</sup>                           | Bloomington <i>Drosophila</i> Stock Centre                                   | RRID:BDSC_55850                  |
| <i>Rpl1</i> <sup>SH0507</sup>                                 | Bloomington <i>Drosophila</i> Stock Centre                                   | RRID:BDSC_29480                  |
| <i>Tif-1A</i> <sup>KG06857</sup>                              | Bloomington <i>Drosophila</i> Stock Centre                                   | RRID:BDSC_14507                  |
| <i>UAS-dA43</i> <sup>RNAi</sup>                               | Vienna <i>Drosophila</i> Resource Center                                     | v103392                          |
| <i>UAS-Tif-1A</i> <sup>RNAi</sup>                             | Vienna <i>Drosophila</i> Resource Center                                     | v20334                           |

(Continued on next page)

| <b>Continued</b>                                       |                                   |                                                                                                                                                                             |
|--------------------------------------------------------|-----------------------------------|-----------------------------------------------------------------------------------------------------------------------------------------------------------------------------|
| REAGENT or RESOURCE                                    | SOURCE                            | IDENTIFIER                                                                                                                                                                  |
| UAS-dC160 <sup>RNAi</sup>                              | Vienna Drosophila Resource Center | v30512                                                                                                                                                                      |
| UAS-CD8-GFP                                            | Linda Partridge                   | N/A                                                                                                                                                                         |
| Oligonucleotides                                       |                                   |                                                                                                                                                                             |
| <i>Drosophila Rpl1-F 5'</i> TAAGCTTCCGCCCTCGCCAC 3'    | Eurofins                          | N/A                                                                                                                                                                         |
| <i>Drosophila Rpl1-R 5'</i> TAACCGACAGCCCTCGCTGC 3'    | Eurofins                          | N/A                                                                                                                                                                         |
| <i>Drosophila Blos1-F 5'</i> GCGAAAACAGGAACAGGAGG 3'   | Eurofins                          | N/A                                                                                                                                                                         |
| <i>Drosophila Blos1-R 5'</i> GTCCAGCCGCTTCTGGTTC 3'    | Eurofins                          | N/A                                                                                                                                                                         |
| pre-rRNA ITS-F 5' TTAGTGTGGGGCTTGGCAACCT 3'            | Eurofins                          | N/A                                                                                                                                                                         |
| pre-rRNA ITS-R 5' CGCCGTTGTTGTAAGTACTCGCC 3'           | Eurofins                          | N/A                                                                                                                                                                         |
| pre-rRNA ETS-F 5' GTTGCCGACCTCGCATTGTTCG 3'            | Eurofins                          | N/A                                                                                                                                                                         |
| pre-rRNA ETS-R 5' CGGAGCCAAGTCCCGTGTCAA 3'             | Eurofins                          | N/A                                                                                                                                                                         |
| pre-rRNA 18S-F 5' TGTAGCCTTCATTCATGTTGGCAG 3'          | Eurofins                          | N/A                                                                                                                                                                         |
| pre-rRNA 18S-R 5' ACCAACAGGTACGGCTCCAC 3'              | Eurofins                          | N/A                                                                                                                                                                         |
| pre-rRNA 28S-F 5' CCTGCCGAAGCAACTAGCCCTT 3'            | Eurofins                          | N/A                                                                                                                                                                         |
| pre-rRNA 28S-R 5' CCATGCAGGCTTACGCCAAAC 3'             | Eurofins                          | N/A                                                                                                                                                                         |
| <i>Drosophila Tubulin-F 5'</i> TGGGCCCGTCTGGACCACAA 3' | Eurofins                          | N/A                                                                                                                                                                         |
| <i>Drosophila Tubulin-R 5'</i> TCGCCGTCACCGGAGTCCAT 3' | Eurofins                          | N/A                                                                                                                                                                         |
| Software and Algorithms                                |                                   |                                                                                                                                                                             |
| Microsoft Excel                                        | Microsoft                         | <a href="https://www.microsoft.com/en-gb/">https://www.microsoft.com/en-gb/</a>                                                                                             |
| Fiji                                                   | ImageJ                            | (Schindelin et al., 2012)                                                                                                                                                   |
| R statistics package                                   | R Core Team                       | <a href="https://www.r-project.org/">https://www.r-project.org/</a>                                                                                                         |
| JMP13                                                  | SAS                               | <a href="https://www.jmp.com/en_be/home.html">https://www.jmp.com/en_be/home.html</a>                                                                                       |
| Ethovision XT video tracking software                  | Noldus                            | <a href="https://www.noldus.com/ethovision-xt">https://www.noldus.com/ethovision-xt</a>                                                                                     |
| Adobe Photoshop                                        | Adobe                             | <a href="https://www.adobe.com/uk/products/photoshop.html?promoid=PC1PQQ5T&amp;mv=other">https://www.adobe.com/uk/products/photoshop.html?promoid=PC1PQQ5T&amp;mv=other</a> |
| Zeiss Zen                                              | Zeiss                             | <a href="https://www.zeiss.com/microscopy/int/products/microscope-software/zen.html">https://www.zeiss.com/microscopy/int/products/microscope-software/zen.html</a>         |
| Other                                                  |                                   |                                                                                                                                                                             |
| Drosophilippers                                        | Drosophilipper                    | <a href="http://www.drosophilipper.com">www.drosophilipper.com</a>                                                                                                          |
| Zeiss LSM 700 confocal laser scanning microscope       | Zeiss                             | N/A                                                                                                                                                                         |
| QuantStudio 6cFlex real-time PCR machine               | Thermo Fisher Scientific          | N/A                                                                                                                                                                         |
| Nanodrop 2000C spectrophotometer                       | Thermo Fisher Scientific          | N/A                                                                                                                                                                         |
| Glass beads                                            | Sigma                             | #G8772                                                                                                                                                                      |
| Mettler Toledo AT201 precision balance                 | Mettler Toledo                    | N/A                                                                                                                                                                         |

## LEAD CONTACT AND MATERIALS AVAILABILITY

Further information and requests for resources and reagents should be directed and will be fulfilled by the Lead Contact, Nazif Alic ([n.alic@ucl.ac.uk](mailto:n.alic@ucl.ac.uk)). This study did not generate new unique reagents.

## EXPERIMENTAL MODEL AND SUBJECT DETAILS

The outbred, wild-type stock was collected in 1970 in Dahomey (now Benin) and has been kept in population cages to maintain life-span and fecundity at levels similar to wild-caught flies. The white Dahomey ( $w^{Dah}$ ) stock was derived by incorporation of the  $w^{1118}$  mutation into the outbred Dahomey background by successive backcrossing and Wolbachia-cleared by tetracycline treatment. All mutants and transgenes were backcrossed at least six times into this background. Where required, combinations of transgenes were generated using standard fly genetic approaches while avoiding population bottlenecks. Stocks were maintained and experiments conducted at 25°C on a 12L:12D cycle at 60% humidity, on SYA food (Bass et al., 2007) containing 10% brewer's yeast, 5% sucrose,

and 1.5% agar (all w/v). Experiments were performed on females (except the experiment shown in Figure S4A, which was done on males) housed 10–15 per vial. The researchers were not blinded to the conditions.

## METHOD DETAILS

### Fly husbandry and lifespan assays

Experimental flies were generated from suitable crosses, eggs collected over a 22–24h period, recovered in PBS and 18–20  $\mu$ L of egg sediment was placed in bottles containing SYA medium to rear flies at standardized larval density. Once emerged, the adults were transferred to fresh bottles, allowed to mate for 48 h and females sorted into experimental vials at a density of 15 flies per vial (10 flies per vial for RNA extractions). Where required, RU486 (Sigma #M8046, dissolved in ethanol) was added to 200  $\mu$ M final concentration or as indicated. For control treatments, the volume of the vehicle alone corresponding to the highest concentration was added. Note that for exploratory walking assays, the relevant mutants or wild-type were crossed into Dahomey (*Wolbachia* negative) so that all experimental flies were *w/w*<sup>1118</sup>. For lifespan assays, flies were transferred to fresh vials and their survival was scored two–three times a week.

### Weight measurements

To measure fly body weight, individual adult female flies were snap-frozen in liquid nitrogen and weighed on a Mettler Toledo AT201 precision balance (analytical weighing to within 0.0001 g).

### Exploratory walking assays

Exploratory walking assay has been described (Ismail et al., 2015; Martin, 2004). At indicated times, individual flies were placed in 4cm diameter/1cm height circular Perspex arena, allowed to rest for one minute and then were video recorded for 15 minutes. Videos were analyzed using Ethovision XT video tracking software (Noldus) to extract the parameters of each walk. Naive flies were used at each time point.

### Negative geotaxis assays

Flies were tipped using *Drosophilippers* ([www.drosophilipper.com](http://www.drosophilipper.com)). At indicated times, flies were transferred to empty vials placed so that they could climb 2 vial heights. Flies were allowed to acclimatise for 5 min, gently tipped to the bottom of the vial and climbing was video recorded for 40 s. Video stills from the same time point (15 s; the time point when young wild-type flies start reaching maximum height) were analyzed in Fiji (Schindelin et al., 2012) and coordinates exported to Excel (Microsoft). The same cohort was continuously assayed.

### Smurf assays

Smurf assays were essentially performed as described (Rera et al., 2012). At the indicated age the flies were placed on SYA food containing 2.5% (w/v) blue dye (FD&C blue dye no. 1, Fastcolors) for 48 h and scored as full smurfs if completely blue or partial smurfs if the dye had leaked out of the gut but not reached the head. The same cohort was continuously assayed.

### Immunocytochemistry

Midguts were dissected from 7-day-old flies in ice-cold PBS and immediately fixed in 4% formaldehyde for 20–30 min. Guts were washed in PBST (0.2% Triton-X in PBS), blocked with 5% bovine serum albumin or donkey serum in PBST, incubated in primary antibody overnight at 4 C and in secondary for 2 hr at RT, with washes as required. Guts were mounted in mounting medium containing DAPI (Vector Laboratories). The following antibodies were used for staining: Anti-fibrillarin (1:200, Abcam ab5821) was used to stain the nucleoli, anti-phospho-Histone H3 (1:100, Cell Signaling UK #9701) to stain mitotic cells, and 488-conjugated Alexa Fluor anti-GFP (1/500, Thermo Fisher Scientific #A21311) to mark GFP. The secondary antibodies Alexa Fluor 594 donkey anti-rabbit (Thermo Fisher Scientific #A21207) and Alexa Fluor 488 donkey anti-mouse (Thermo Fisher Scientific, #A21202) were used at a concentration of 1:1000.

### PH3 quantification, nucleolar measurements, and DAPI intensity quantification

All microscope and representative images (stacks) were taken with a Zeiss LSM700 confocal microscope, unless otherwise stated. PH3 positive cells per midgut were counted on a fluorescence microscope. Fibrillarin staining was imaged and the nucleus (DAPI) was manually traced and measured using Zeiss Zen® software from a random selection of enterocyte nuclei imaged at their widest diameter in the posterior midgut. Images were processed in Fiji (Schindelin et al., 2012) and Adobe Photoshop (Adobe) for publication. To calculate relative DAPI intensity of gut nuclei, adult female flies were dissected and fixed as described above, then mounted in fluorescent medium containing DAPI. DAPI intensity was quantified in every nucleus (traced automatically) and corrected by subtracting the background intensity using Fiji® (Schindelin et al., 2012). DAPI intensity data were expressed relative to the control imaged at the same time.

### RNA, DNA extraction and qPCR

Total RNA and DNA were quantitatively isolated from the same sample of ten whole 7-day-old adult flies, or ten dissected midguts, using TRIZOL (Invitrogen) according to manufacturer's instructions. RNA was converted to cDNA using random hexamers and Superscript II (Invitrogen) according to manufacturer's instructions. Quantitative PCR on cDNA or DNA was performed using Power SYBR Green PCR Master Mix (ABI), on QuantStudio6 Flex real-time PCR, and quantities of each sequence were determined with the relative standard curve method (Larionov et al., 2005). RNA/DNA (or RNA/RNA) ratio was calculated per sample. For gut extractions, data were scaled to batch. Data were expressed relative to the control.

### Assessing developmental lethality

To assess developmental lethality, development was tracked over 10 d after 2-4 h egg laying period.

### Puromycin incorporation assays

Thorax and abdomen of individual flies were opened along the ventral midline in ice-cold PBS, with wild-type and mutant flies processed in batches carried out in parallel. Flies were then placed in 0.2 mL of ice-cold Schneider's medium (Sigma, #S0146). 0.8 mL of the same medium containing puromycin (GIBCO, #A1113803) and pre-warmed to 25°C was added and puromycin incorporation was assayed as before (Filer et al., 2017), with the exception that the flies were broken with glass beads (Sigma, #G8772) and protein separated on gradient gels (Thermo Fisher Scientific, #NP0322BOX). The western blotting used anti-puromycin antibody (Milipore, #12D10) with Anti-Actin (Abcam, #ab8224) as the loading control. The intensity of anti-puromycin staining between 15 and 165 kDa was quantified from chemiluminescence images (using an Anti-Mouse secondary HRP antibody, Abcam, #ab6789) in Fiji (Schindelin et al., 2012), relative to Actin, scaled to replicate batch and expressed relative to the control.

### QUANTIFICATION AND STATISTICAL ANALYSIS

Statistical analysis was performed in Excel (Microsoft; long-rank test), JMP-13 (SAS; log-rank test, linear model, mixed effects linear model, ordinal logistic regression, t test) or R (R core team; Cox Proportional Hazards). Where relevant, time was included as a continuous variable. All models had a full factorial design. P values < 0.05 were considered as significant. Details of tests, including the number and nature of replicate samples (n), are given in figure legends and in the text.

### DATA CODE AND AVAILABILITY

This study did not generate any datasets. Source data for figures is available as a Mendeley dataset <https://dx.doi.org/10.17632/46cj62735f.1>. All other data will be made available from the corresponding author on request.

**Cell Reports, Volume 30**

**Supplemental Information**

**Partial Inhibition of RNA Polymerase I**

**Promotes Animal Health and Longevity**

**Guillermo Martínez Corrales, Danny Filer, Katharina C. Wenz, Abbie Rogan, George Phillips, Mengjia Li, Yodit Feseha, Susan J. Broughton, and Nazif Alic**

**A**

| yeast subunit | yeast gene    | fly gene       |
|---------------|---------------|----------------|
| A190          | <i>RPA190</i> | <i>Rpl1</i>    |
| A135          | <i>RPA135</i> | <i>Rpl135</i>  |
| A49           | <i>RPA49</i>  | -              |
| A43           | <i>RPA43</i>  | <i>CG13773</i> |
| A34.5         | <i>RPA34</i>  | -              |
| A14           | <i>RPA14</i>  | -              |
| A12.2         | <i>RPA12</i>  | <i>Rpl12</i>   |

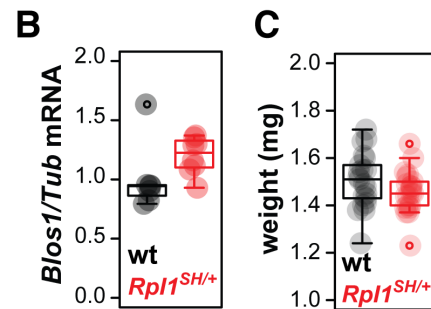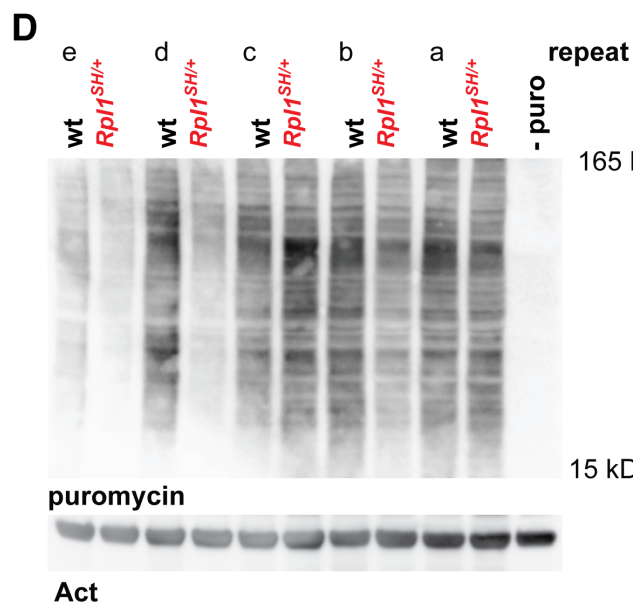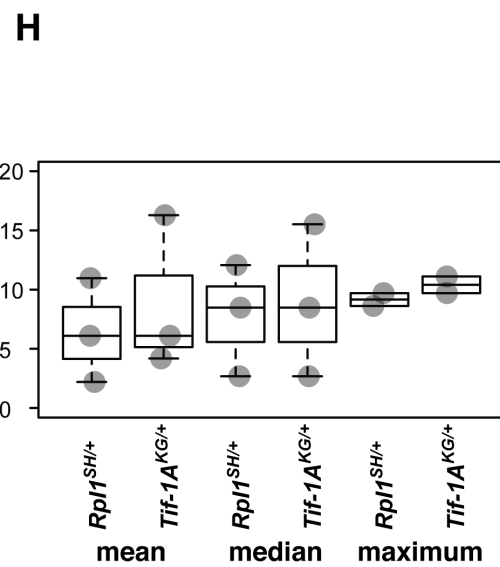

**E**

| covariate                                                    | effect | p                   |
|--------------------------------------------------------------|--------|---------------------|
| intercept                                                    | 0.151  | <1x10 <sup>-4</sup> |
| genotype ( <i>Rpl1<sup>SH/+</sup></i> )                      | -0.017 | 0.012               |
| nuclear size (large)                                         | 0.035  | <1x10 <sup>-4</sup> |
| genotype ( <i>Rpl1<sup>SH/+</sup></i> ):nuclear size (large) | -0.014 | 2x10 <sup>-4</sup>  |

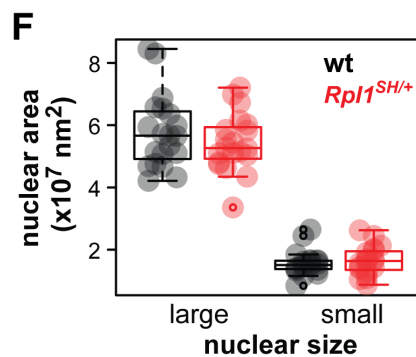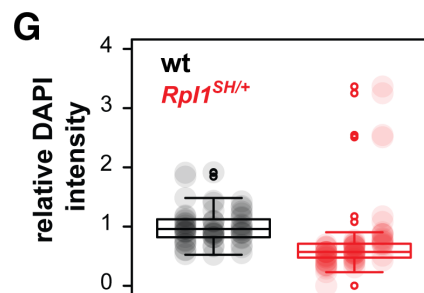



**Figure S1 Reduction in Pol I activity extends lifespan. Related to Figure 1.**

- (A) The fly genes encoding Pol I-specific subunits were identified with BLAST and reverse BLAST using the budding yeast genes. “-“ indicates that the subunit could not be identified.
- (B) Relative levels of *Blos1* mRNA in *Rpl1<sup>SH/+</sup>* and wild-type females (n=7-8 biologically independent samples, p>0.05, *t-test*).
- (C) Weight of *Rpl1<sup>SH/+</sup>* and wild-type females. *Rpl1<sup>SH/+</sup>* females tended to weight slightly less than the wild-type but this difference was not significant (n=21 individual flies, p>0.05, *t-test*).
- (D) Western blot showing all the repeats of the puromycin incorporation assay.
- (E) Results of the *mixed effect LM* analysis of relative nucleolar size.
- (F) Nuclear size in *Rpl1<sup>SH/+</sup>* and wild-type female guts (n= 1-5 nuclei per animal per nuclear size, 4-5 animals where values from the same animal are indicated as vertically aligned points in the box plot, effect of genotype p>0.05, nuclear size p<1x10<sup>-4</sup>, interaction p>0.05, *mixed effects LM* with “animal” as random effect).
- (G) DAPI intensities measured in ECs of *Rpl1<sup>SH/+</sup>* and wild-type females. *Rpl1<sup>SH/+</sup>* females tended to show lower DAPI signal in ECs than the wild-type but this difference was not significant (n= 20-25 nuclei, 3 animals where values from the same animal are indicated as vertically aligned points in the box plot, effect of genotype p>0.05, *mixed effects LM* with “animal” as random effect).
- (H) Summary of mean, median and maximum (last 5% surviving) lifespan extension in *Rpl1<sup>SH/+</sup>* females relative to wild-type females observed in three independent replicates. Lifespan was significantly extended in each (p<0.05, *log-rank test*). One of the replicates is shown in Figure 1. Note that due to the pattern of death, the maximum lifespan parameter could not be obtained from one replicate.

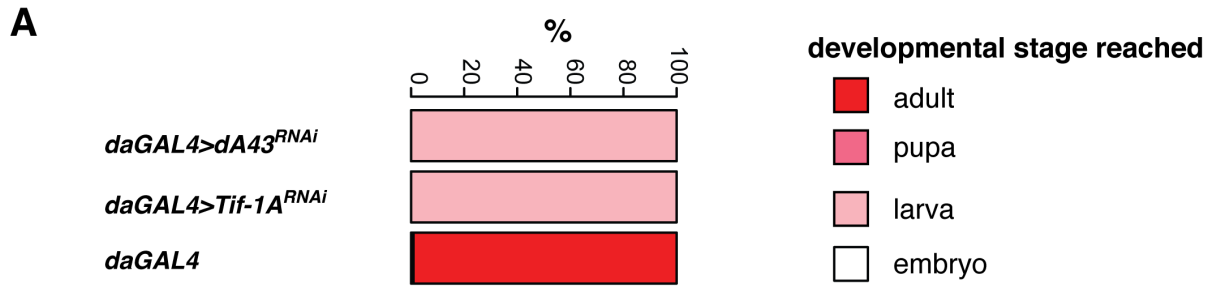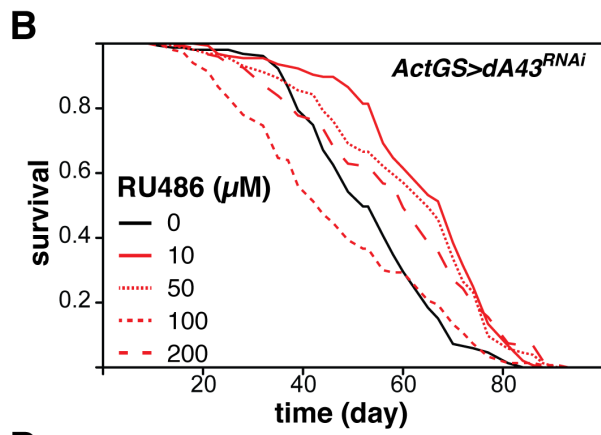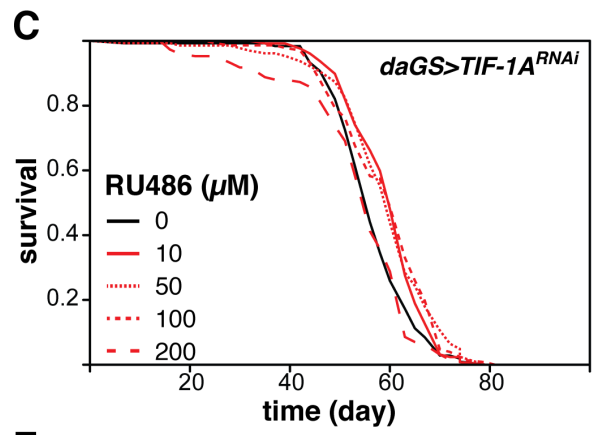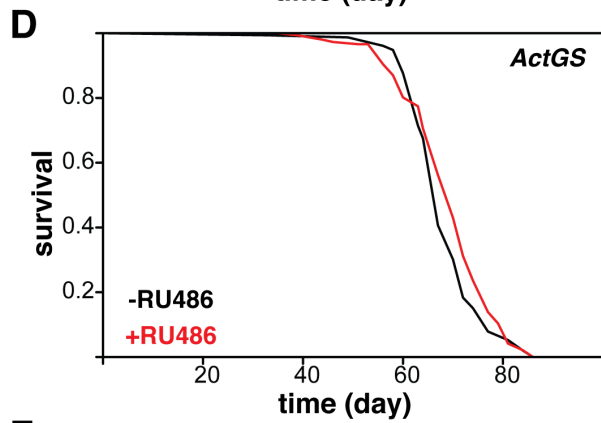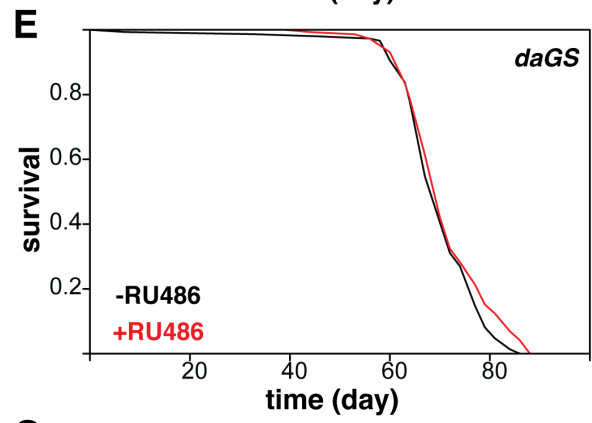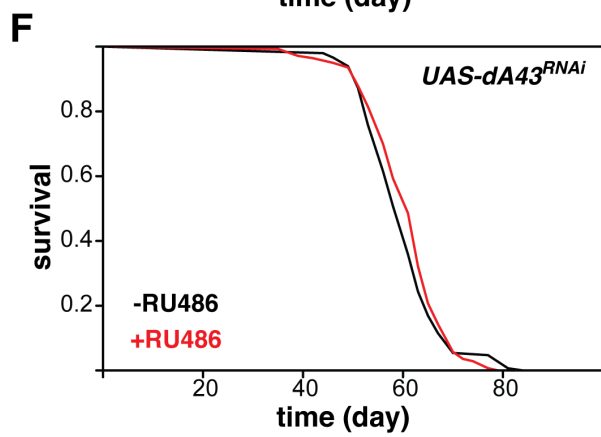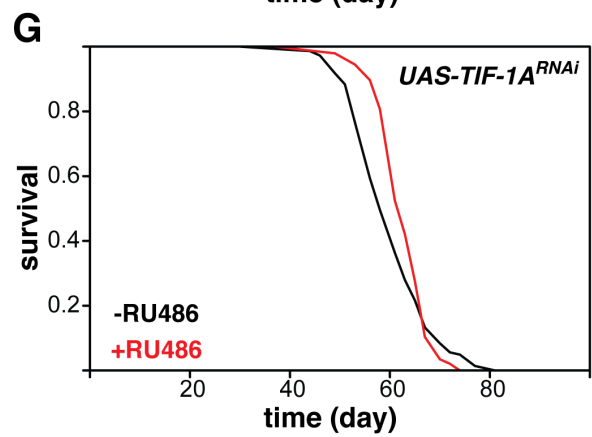

**Figure S2 Reduction in Pol I activity extends lifespan. Related to Figure 1.**

- (A) Pre-adult lethality resulting from ubiquitous, constitutive expression of *dA43<sup>RNAi</sup>* or *Tif-1A<sup>RNAi</sup>*. The frequency of the developmental stage reached is shown as %. Note that flies containing a balancer chromosome were removed from calculations. n= 54 – 107.
- (B) Lifespan of females with adult-onset, ubiquitous induction of *dA43<sup>RNAi</sup>* achieved by feeding a range of RU486 doses: 0  $\mu\text{M}$  (n= 154 dead/4 censored flies), 10  $\mu\text{M}$  (n= 155/1,  $p=4\times 10^{-12}$  to no RU486, *log-rank test*), 50  $\mu\text{M}$  (n= 157/5,  $p=4\times 10^{-8}$ ), 100  $\mu\text{M}$  (n= 150/1,  $p>0.05$ ), 200  $\mu\text{M}$  (n= 148/2,  $p=3\times 10^{-5}$ ).
- (C) Lifespan of females with adult-onset, ubiquitous induction of *Tif-1A<sup>RNAi</sup>* achieved by feeding a range of RU486 doses: 0  $\mu\text{M}$  (n= 115/16), 10  $\mu\text{M}$  (n= 127/14,  $p=5\times 10^{-3}$  to no RU486, *log-rank test*), 50  $\mu\text{M}$  (n= 124/16,  $p=2\times 10^{-3}$ ), 100  $\mu\text{M}$  (n= 128/15,  $p=3\times 10^{-3}$ ), 200  $\mu\text{M}$  (n= 131/19,  $p>0.05$ ).
- (D)- (H) Lifespans of control females carrying driver or transgene alone with/without RU486 (n $\approx$  150,  $p>0.05$ , *log-rank test*).

For lifespans, fly genotype is noted in the top right corner of each panel.

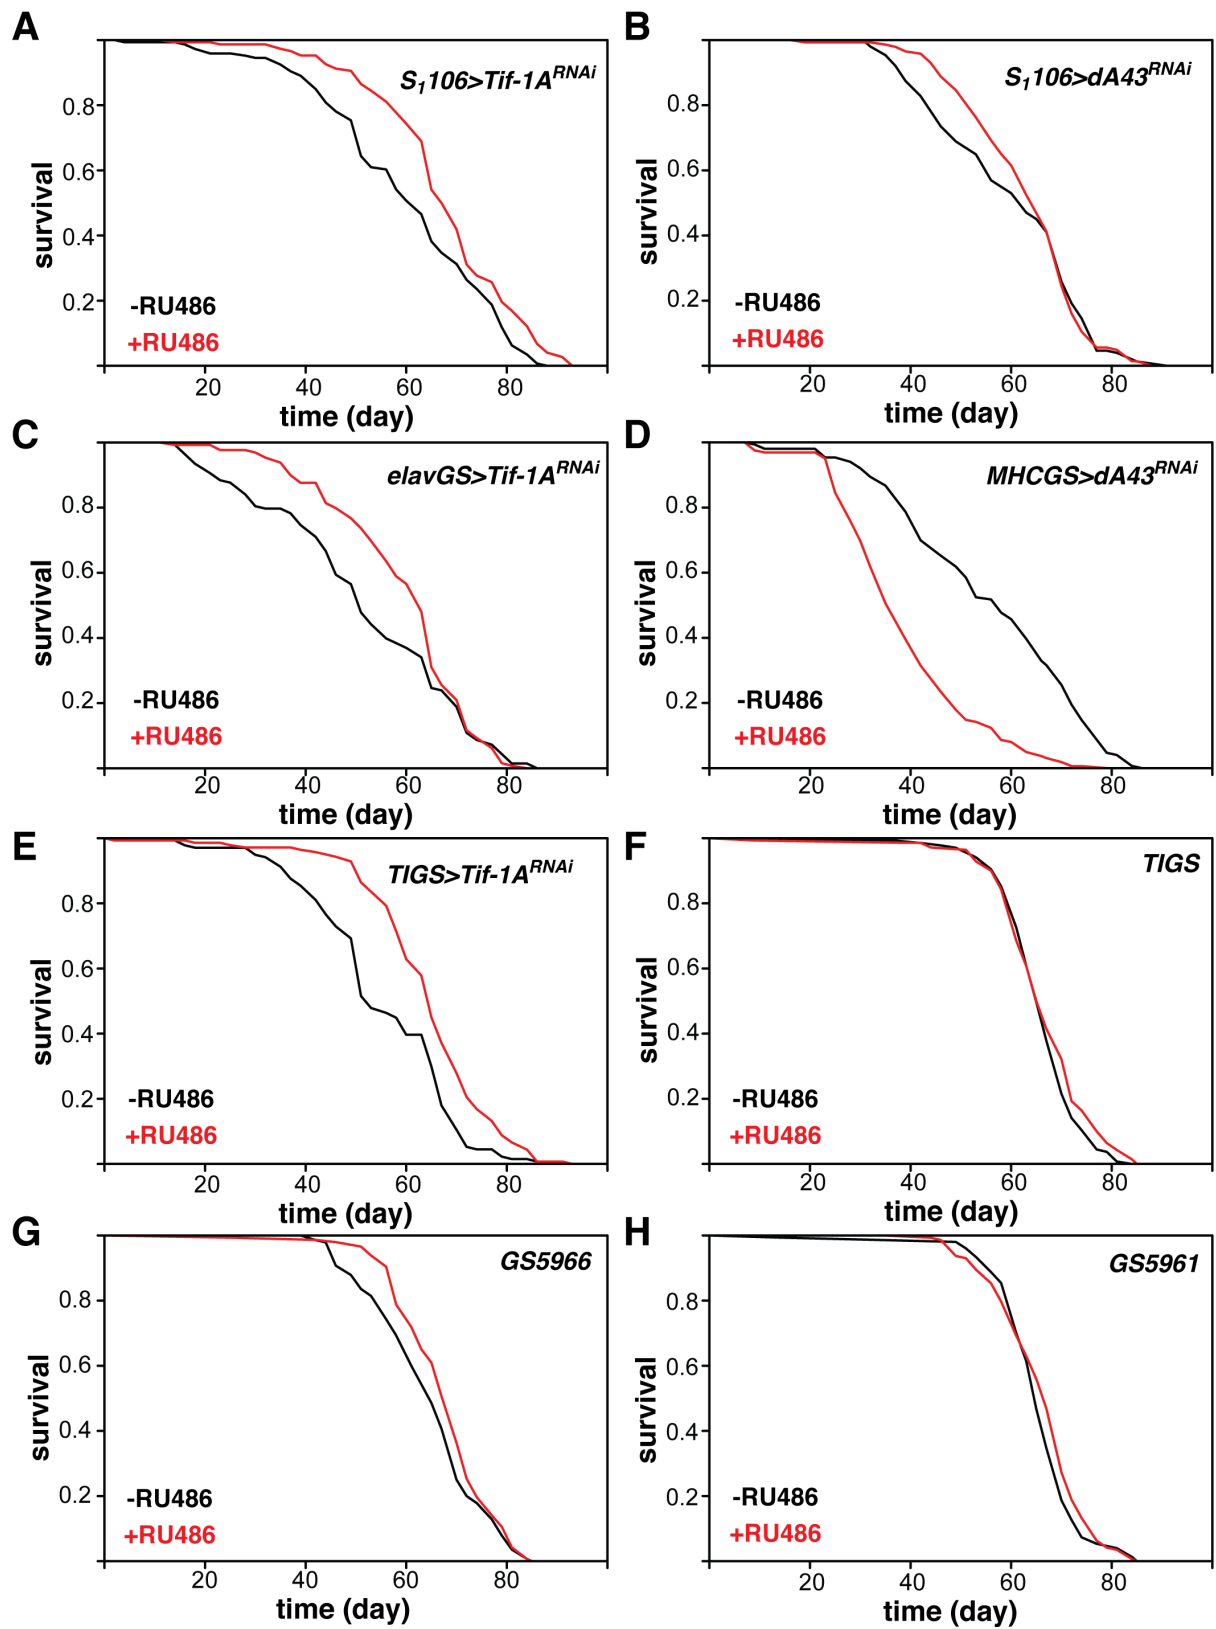

**Figure S3 Tissue-specific, adult-onset inhibition of Pol I can extend lifespan.**

**Related to Figure 2.**

- (A) Lifespan of females with adult-onset induction of *dA43<sup>RNAi</sup>* in fat body and gut achieved by RU486 feeding (-RU486 n= 151 dead/2 censored flies, +RU486 n= 143/1,  $p>0.05$ ).
- (B) Lifespan of females with adult-onset induction of *Tif-1A<sup>RNAi</sup>* in fat body and gut achieved by RU486 feeding (-RU486 n= 145/2, +RU486 n= 148/2,  $p=2\times 10^{-4}$ ).
- (C) Lifespan of females with adult-onset induction of *Tif-1A<sup>RNAi</sup>* in neurons achieved by RU486 feeding (-RU486 n= 138/1, +RU486 n= 129/3,  $p>0.05$ ).
- (D) Lifespan of females with adult-onset induction of *dA43<sup>RNAi</sup>* in muscle achieved by RU486 feeding (-RU486 n= 149/5, +RU486 n= 162/0,  $p=5\times 10^{-21}$ ).
- (E) Lifespan of females with adult-onset, gut-restricted induction of *Tif-1A<sup>RNAi</sup>* achieved by RU486 feeding (-RU486 n= 135 dead/3 censored, +RU486 n= 139/2,  $p=2\times 10^{-6}$ , *log-rank test*).
- (F) – (H) Lifespans of control females carrying driver alone with/without RU486 ( $n\approx 140$ ,  $p>0.05$ , *log-rank test*).

Fly genotype is noted in the top right corner of each panel.

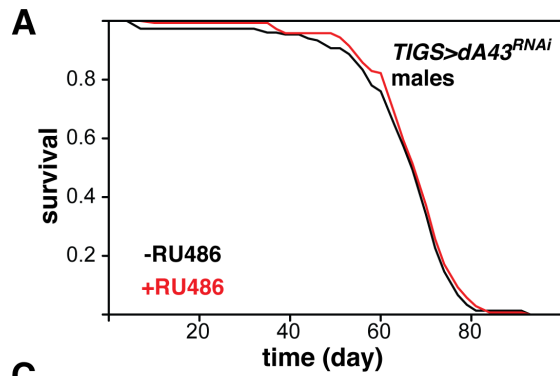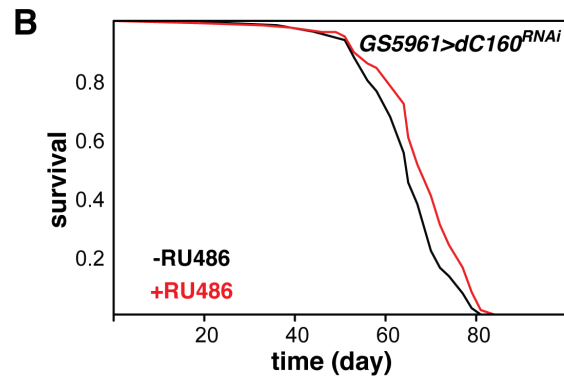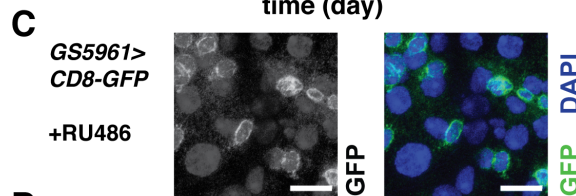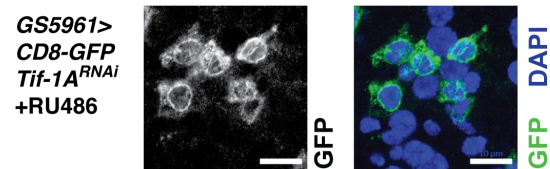

**D**  
covariate

| genotype                                                   |  | HR      | p                     |
|------------------------------------------------------------|--|---------|-----------------------|
| combined Pol I & III versus individual Pol I & III         |  | 1.30889 | 4.2x10 <sup>-11</sup> |
| Pol III versus Pol I                                       |  | 0.44783 | <2x10 <sup>-16</sup>  |
| RU486                                                      |  | 0.70339 | 1.6x10 <sup>-6</sup>  |
| genotype:RU486                                             |  | HR      | p                     |
| combined Pol I and III versus individual Pol I & III:RU486 |  | 1.00982 | 0.85                  |
| Pol III versus Pol I:RU486                                 |  | 0.94065 | 0.48                  |

**E**

**Individual response variables**

*moving duration*      *velocity*      *time in central zone*      *rotation frequency*

**Multivariate analysis**

| Covariate    | p value           | <i>moving duration</i> | <i>velocity</i>   | <i>time in central zone</i> | <i>rotation frequency</i> |
|--------------|-------------------|------------------------|-------------------|-----------------------------|---------------------------|
| age          | <10 <sup>-4</sup> | <10 <sup>-4</sup>      | <10 <sup>-4</sup> | 1.6x10 <sup>-3</sup>        | <10 <sup>-4</sup>         |
| genotype     | 0.06              | 0.06                   | 0.77              | 0.14                        | 0.64                      |
| age:genotype | 0.01              | 0.01                   | 0.26              | 0.93                        | 0.24                      |

**F**

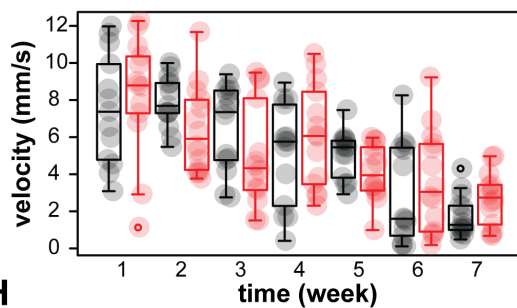

**G**

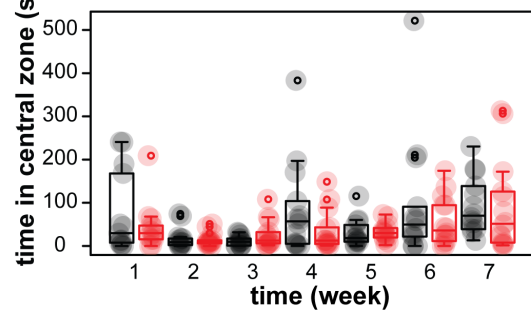

**H**

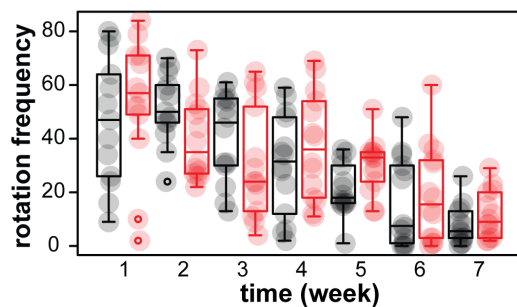

**Figure S4 Relationship between Pol I and Pol III in the ISCs and analysis of exploratory walking. Related to Figure 3 and Figure 4.**

- (A) Induction of  $dA43^{RNAi}$  in the male gut does not extend lifespan ( $n \approx 150$ ,  $p > 0.05$ , *log-rank test*).
- (B) Lifespan of females with adult-onset induction of  $dC160^{RNAi}$  (targeting Pol III) in the ISCs achieved by RU486 feeding (-RU486  $n = 138$  dead/3 censored flies, +RU486  $n = 131/1$ ,  $p = 1 \times 10^{-3}$ , *log-rank test*). Note that this lifespan was carried out in parallel with the lifespans presented in Figure 4B. Fly genotype is noted in top right corner in A and B.
- (C)  $UAS-Tif-1A^{RNAi}$  does not interfere with the ability of the  $GS5961$  driver to induce expression of  $UAS-CD8-GFP$  in the presence of RU486 (scale bar = 10  $\mu m$ ).
- (D) *Cox Proportional Hazards* analysis of the interaction between induction of  $dC160^{RNAi}$  or  $Tif-1A^{RNAi}$  in ISCs (total  $n = 770$  dead/ 57 censored flies). The model examined the effect of genotype, RU486 and their interaction where the effect of genotype was assessed using two *a priori* contrasts: 1) comparing the genotype containing both RNAi lines to the genotypes containing only one RNAi line, 2) comparing the genotypes containing the single RNAi lines to each other. “:” indicates the interaction term. Note that the lack of significant interaction between genotype and RU486 indicates the lifespan effects of each Pol I are not significantly different from each other or from the combined knockdown. The data included in the model are shown in Figure 3B and Figure S3B.
- (E) Full statistical analysis of exploratory walking data. Results of the multivariate LM including the response of individual variables.
- (F) – (H) Additional parameters of exploratory walking.
